# Supplementary material for: Use of sequential extraction and mercury stable isotope analysis to assess remobilization of sediment-bound legacy mercury
Source: Royal Society of Chemistry journal article supplement (doi:10.1039/d1em00019e), 2021-01-01
Supplement: d1em00019e1.pdf [file d1em00019e1.pdf]

***Supporting Information for:***

**Use of Sequential Extraction and Mercury Stable Isotope Analysis to Assess  
Remobilization of Sediment-Bound Legacy Mercury**

Elizabeth R. Crowther,<sup>\*a</sup> Jason D. Demers,<sup>a</sup> Joel D. Blum,<sup>a</sup>  
Scott C. Brooks,<sup>b</sup> Marcus W. Johnson<sup>a</sup>

<sup>a</sup>Department of Earth and Environmental Sciences, University of Michigan,  
1100 N. University Ave., Ann Arbor, MI 48109, USA.

<sup>b</sup>Environmental Science Division, Oak Ridge National Laboratory,  
P.O Box 2008, Oak Ridge, TN 37831-6038, USA.

\*Corresponding author: Elizabeth R. Crowther, e-mail: [ecrowth@umich.edu](mailto:ecrowth@umich.edu)

## S1. Quality Control for Total Mercury Analyses

Cold vapor atomic fluorescence spectrometry (CVAFS)<sup>1</sup> was used to measure total mercury (THg) concentrations of sequential extraction solutions and combustion 1% KMnO<sub>4</sub> trap solutions, as well as to determine percent recoveries after purge and trap and transfer procedures. Across all analytical sessions, the percent relative standard deviation (%RSD) of the mean calibration factor (CF<sub>m</sub>) for calibration standards (2.5 to 500 pg Hg, or 0.5 to 100 ng L<sup>-1</sup> on a volumetric basis) was 1.5% (SE = 0.2%, n=18). Average recovery of the lowest calibration standard relative to its expected value was 99.6% (SE = 0.7%, n=18). All initial and calibration verification blanks were below the reporting limit (i.e., the lowest calibration standard) (n=328). Initial calibration verification standards using a certified secondary Hg standard (100, 200, or 300 pg Hg) had an average recovery of 101.1% (SE = 0.3%, n=18). Instrument precision and recovery checks (25 pg Hg, or 5 ng L<sup>-1</sup>) had an average recovery of 99.9% (SE = 0.3%, n=18). Continuing calibration verification standards (100, 200, or 300 pg Hg) had an average recovery of 101.2% (SE < 0.1%, n=268).

The method detection limit (MDL) was approximately 0.5 pg Hg, or 0.1 ng L<sup>-1</sup>. The MDL was calculated using the equation  $MDL = t * SD$ , where t is the student's t-value appropriate for the single-tailed 99th percentile and a standard deviation estimate with n-1 degrees of freedom, and SD is the standard deviation associated with the average mass or concentration of Hg detected in replicate MDL check standards, which should be analyzed at a concentration ~5 times higher than the expected MDL value.<sup>2</sup> Our MDL check standards were analyzed at 2.5 pg Hg, or 0.5 ng L<sup>-1</sup>. In our calculation of the MDL, the t-value was 2.57 (based on 17 degrees of freedom), and the SD value was 0.2 pg, or 0.04 ng L<sup>-1</sup> (n=18).

To assess recovery for sequential extraction samples, matrix spike samples were analyzed, in which an aliquot of spiking solution was added to an aliquot of sample which had undergone UV treatment, which had an average recovery of 100.5% (SE = 0.1%, n=109). Additionally, aliquots of spiking solution were added to a subset of sequential extraction samples prior to undergoing UV treatment, which had an average recovery of 98.4% (SE = 0.5%, n=21). Relative percent difference among duplicate UV-treated sequential extraction sample analyses averaged 1.2% (SE = 0.1%, n=17).

## S2. Sequential Extraction Reagents

Based on the sequential extraction procedure developed by Bloom *et al.*,<sup>3</sup> our reagents were made as follows. F1 (deionized water) was purged overnight with argon gas. F2 (0.1 M acetic acid + 0.01 M HCl) was made by diluting 6 mL glacial acetic acid + 0.8 mL trace metal grade HCl to 1000 mL with deionized water. F3 (1 M KOH) was made by diluting 86 mL of 45% (w/w) reagent grade KOH solution to 1000 mL with deionized water. F4 (12 M HNO<sub>3</sub>) was made by diluting 750 mL trace metal grade HNO<sub>3</sub> to 1000 mL with deionized water. F5 (aqua regia) was made by adding 10 mL trace metal grade HCl, followed by 3 mL trace metal grade HNO<sub>3</sub>, directly into centrifuge tubes. Reagents were diluted in trace metal clean glass volumetric flasks and stored in trace metal clean glass or Teflon bottles.

## S3. Comparison of Sequential Extractions of Reference Materials across Multiple Studies

Our study is one of three that has measured the isotopic composition of sequential extractions of NIST SRM 2711 (Montana Soil), each of which used different reagents to target organically-bound Hg. Wiederhold *et al.*<sup>4</sup> performed a two-step extraction in which 6 M HNO<sub>3</sub> released 19% of the THg from NIST SRM 2711, and Grigg *et al.*<sup>5</sup> performed a four-step extraction in which 0.1 M Na<sub>4</sub>P<sub>2</sub>O<sub>7</sub> released 6.0% of the THg from NIST SRM 2711a. In our study, the 1 M KOH (F3) extraction step was used to target organically-bound Hg, which released  $2.6 \pm 0.2\%$  (1SD, n=3) of the THg from NIST SRM 2711 and was isotopically similar to the residual Hg. For our analysis of NIST SRM 2711,  $\delta^{202}\text{Hg}$  values of the F3 extraction and the weighted average of the F4 and F5 extractions were  $-0.25\text{‰}$  and  $-0.19\text{‰}$ , respectively ( $\pm 0.08\text{‰}$ , 2SD) (Table S5). In the other two studies, the organically-bound fractions tended to be isotopically heavier than the residual Hg, although their delta values were also within analytical uncertainty. For Wiederhold *et al.*,<sup>4</sup>  $\delta^{202}\text{Hg}$  values of the 6 M HNO<sub>3</sub> and aqua regia extractions of NIST SRM 2711 were  $0.05\text{‰}$  and  $-0.33\text{‰}$ , respectively ( $\pm 0.15\text{‰}$ , 2SD), and for Grigg *et al.*,<sup>5</sup>  $\delta^{202}\text{Hg}$  values of the 0.1 M Na<sub>4</sub>P<sub>2</sub>O<sub>7</sub> and aqua regia extractions of NIST SRM 2711a were  $-0.01\text{‰}$  and  $-0.13\text{‰}$ , respectively ( $\pm 0.11\text{‰}$ , 2SD). These differences among various study results are likely due to different reagents (6 M HNO<sub>3</sub>, 0.1 M Na<sub>4</sub>P<sub>2</sub>O<sub>7</sub>, and 1 M KOH) targeting different pools of Hg. Given the large range in the amount of Hg released by these various methods (2.6 to 19%), it seems plausible that different pools of organically-bound Hg with unique isotopic compositions could have been accessed. For example, soil and sediment are

known to contain acid-soluble and base-soluble organic constituents.<sup>6</sup> Additionally, the 6 M HNO<sub>3</sub> step for Wiederhold *et al.*<sup>4</sup> was isotopically more similar to our 12 M HNO<sub>3</sub> step (F4) and released ~7 times more Hg than to our 1 M KOH step (F3), further suggesting that the Hg species found in operationally-defined pools of organically-bound Hg likely differ slightly depending on which reagent is used. Alternatively, differences in the isotopic composition of organically-bound Hg may be due to differences between individual batches of NIST SRM 2711 and NIST SRM 2711a, as reported  $\delta^{202}\text{Hg}$  values of individual batches of NRC MESS-3 have differed by as much as 0.38‰,<sup>7</sup> although the bulk isotopic composition of individual batches of NIST SRM 2711 and NIST SRM 2711a has been shown to be fairly consistent.<sup>4,5,7</sup>

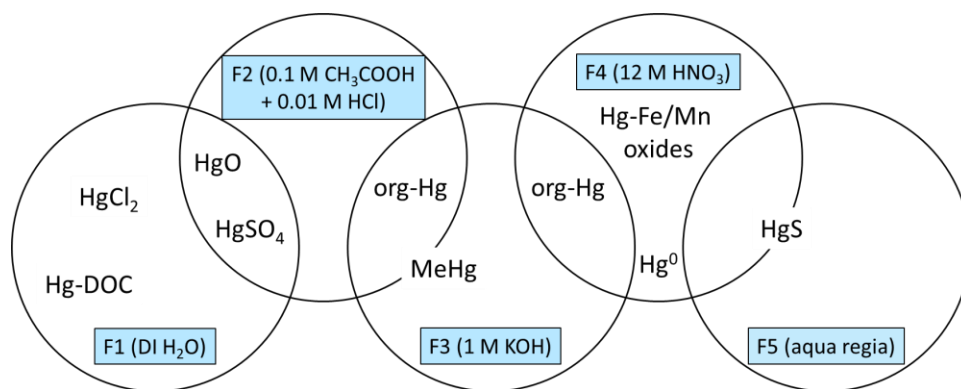

**Figure S1:** Schematic diagram showing Hg compounds that may be released during sequential extractions. Blue boxes indicate the reagents used for the five-step sequential extraction procedure. Hg-DOC represents Hg bound to highly soluble or easily desorbable organic matter, while org-Hg represents Hg bound to less soluble or more strongly sorbed organic matter. Note that methylmercury (MeHg) makes up a small percentage (typically <0.05%) of THg in EFPC streambed sediment.<sup>8</sup> Also note that some Hg(0) may be released during earlier extraction steps. Placement of Hg compounds is approximate, and is based on information found in the literature.<sup>3,9-11</sup>

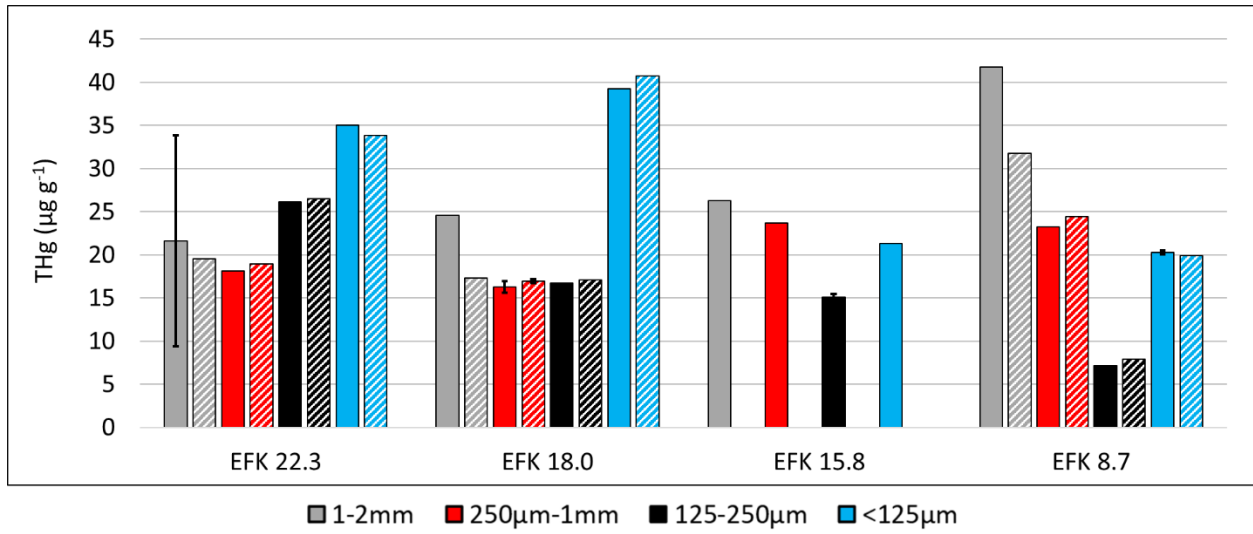

**Figure S2:** Total Hg concentration ( $\mu\text{g g}^{-1}$ ) of EFPC streambed sediment, measured via combustion (solid bars) and the sum of sequential extractions (striped bars). Error bars represent 1SD for combustion sample replicates ( $n=2$ ) or sequential extraction replicates ( $n=2$ ).

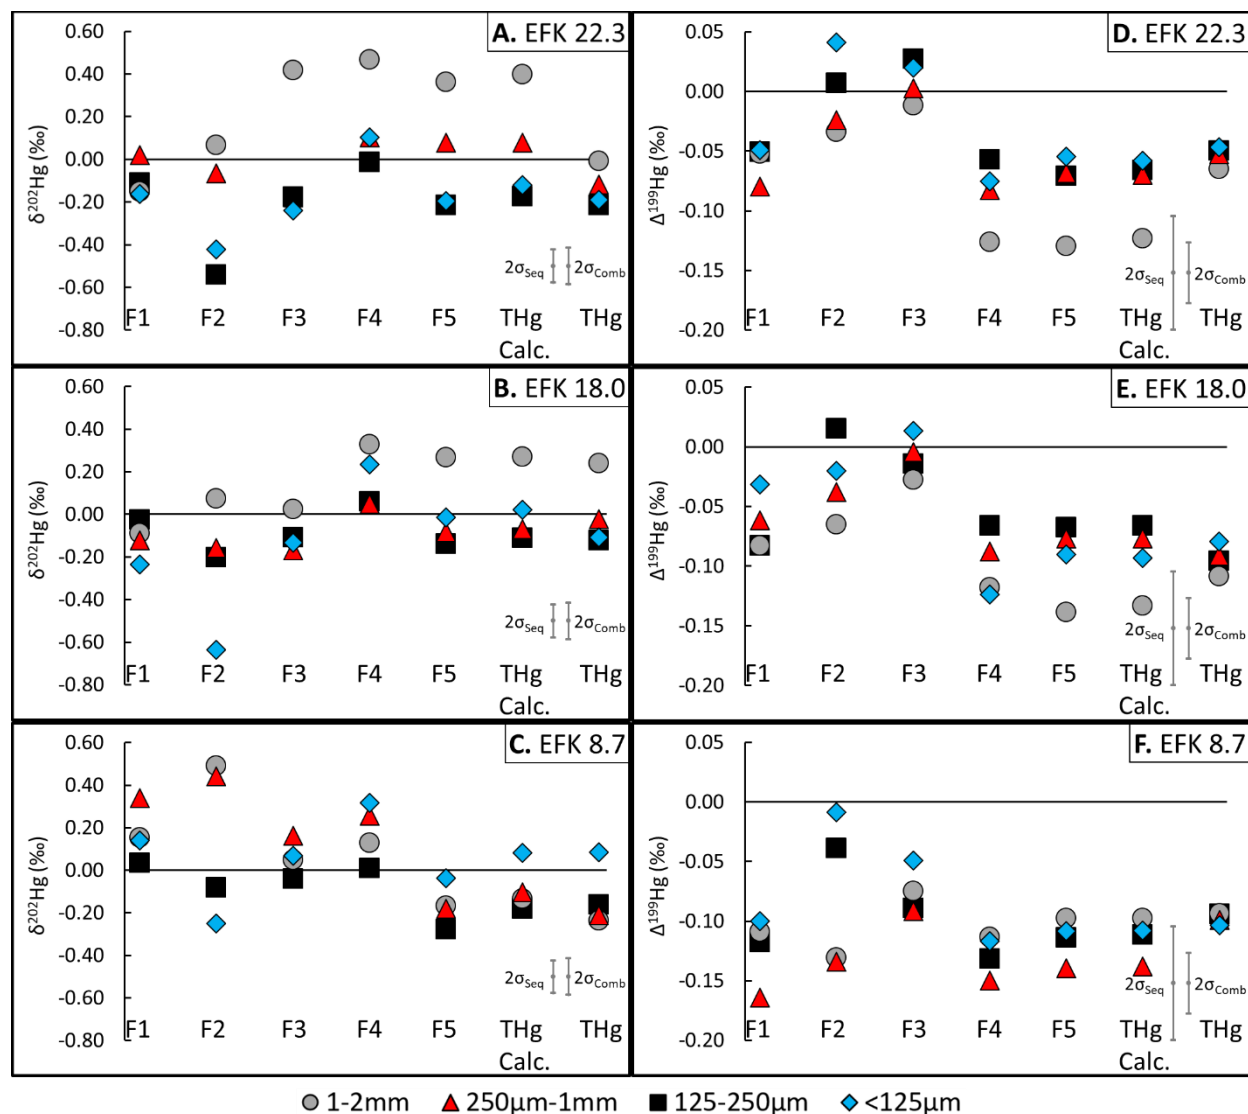

**Figure S3** Mercury isotopic composition of sequential extractions of EFPC streambed sediment. Shown are (A-C)  $\delta^{202}\text{Hg}$  and (D-F)  $\Delta^{199}\text{Hg}$  of sequentially extracted Hg pools, the calculated total Hg based on the weighted average of sequential extraction concentrations (THg Calc.), and bulk sediment measured via combustion (THg). Some of the THg points represent an average of combustion replicates (Table S3, Table S4). Analytical uncertainty in sequential extraction delta values is shown as the average uncertainty (2SD) across all UM-Almadén analyses ( $2\sigma_{\text{seq}}$ ). Analytical uncertainty in combustion sample delta values is shown as the average uncertainty (2SD) across combustion reference material analyses ( $2\sigma_{\text{comb}}$ ) (see Section 2.5).

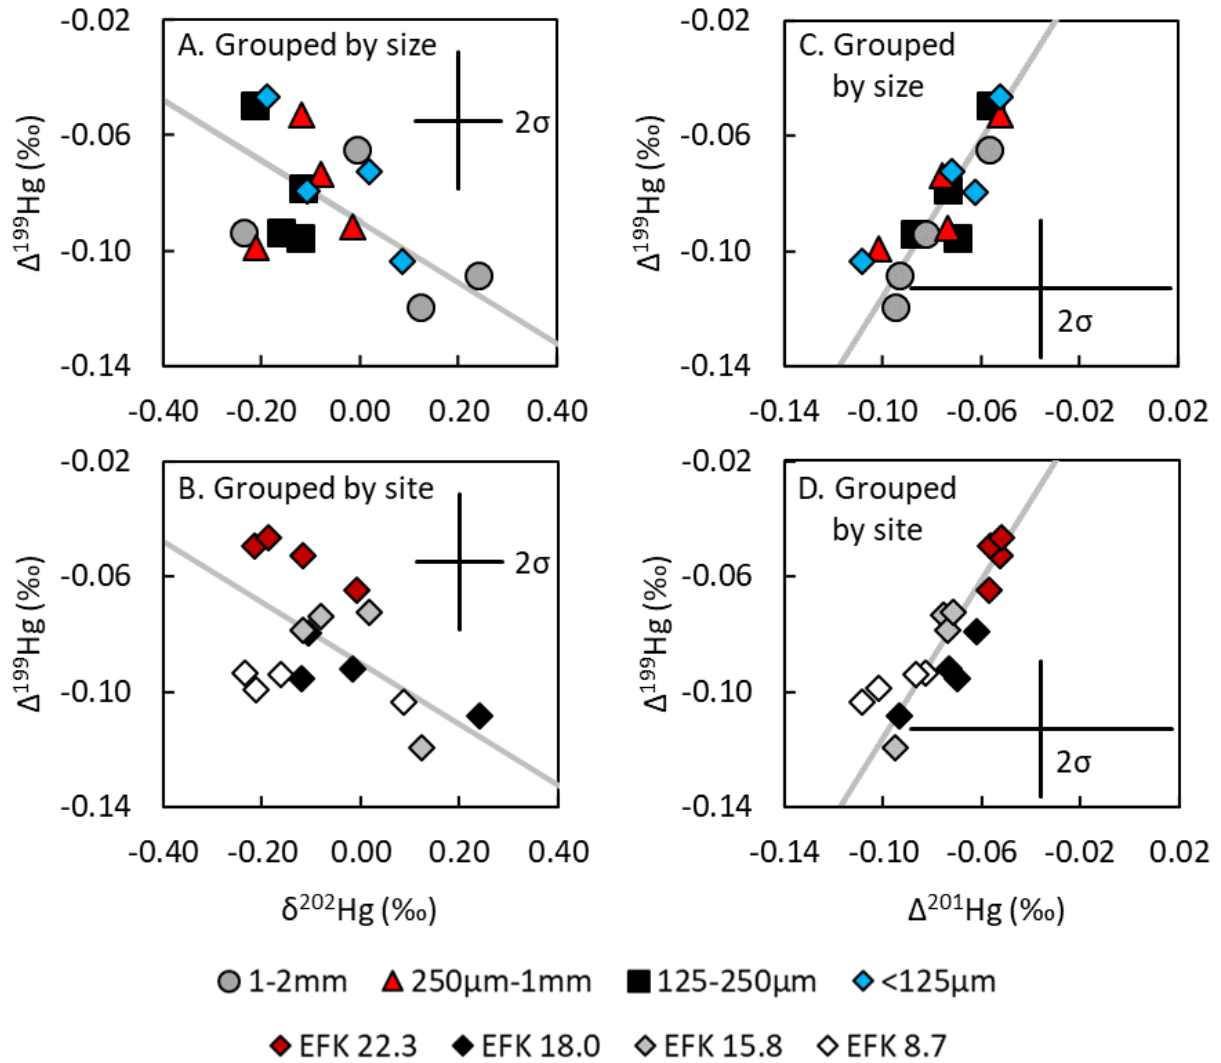

**Figure S4** Mercury isotopic composition of EFPC streambed sediment, measured via combustion. Shown are (A and B)  $\Delta^{199}\text{Hg}$  versus  $\delta^{202}\text{Hg}$  and (C and D)  $\Delta^{199}\text{Hg}$  versus  $\Delta^{201}\text{Hg}$  for samples grouped by (A and C) sediment size fraction and (B and D) sampling site. Analytical uncertainty in delta values is shown as the average uncertainty (2SD) across combustion reference material analyses (see Section 2.5). Using the York regression,<sup>12</sup> the  $\Delta^{199}\text{Hg}/\delta^{202}\text{Hg}$  slope is  $-0.11 (\pm 0.01, 1\text{SE}, n=16)$ , and the  $\Delta^{199}\text{Hg}/\Delta^{201}\text{Hg}$  slope is  $1.37 (\pm 0.21, 1\text{SE}, n=16)$ . Slopes were generated using IsoplotR.<sup>13</sup>



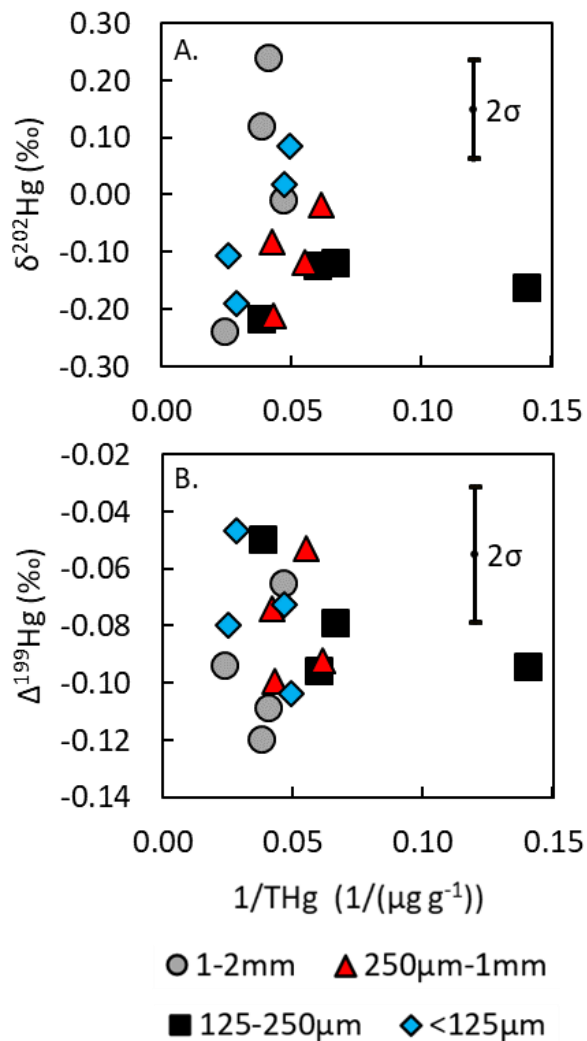

**Figure S5:** Mercury isotopic composition of EFPC streambed sediment, measured via combustion. Shown are (A)  $\delta^{202}\text{Hg}$  and (B)  $\Delta^{199}\text{Hg}$  versus inverse total Hg concentration. Analytical uncertainty in delta values is shown as the average uncertainty (2SD) across combustion reference material analyses (see Section 2.5).

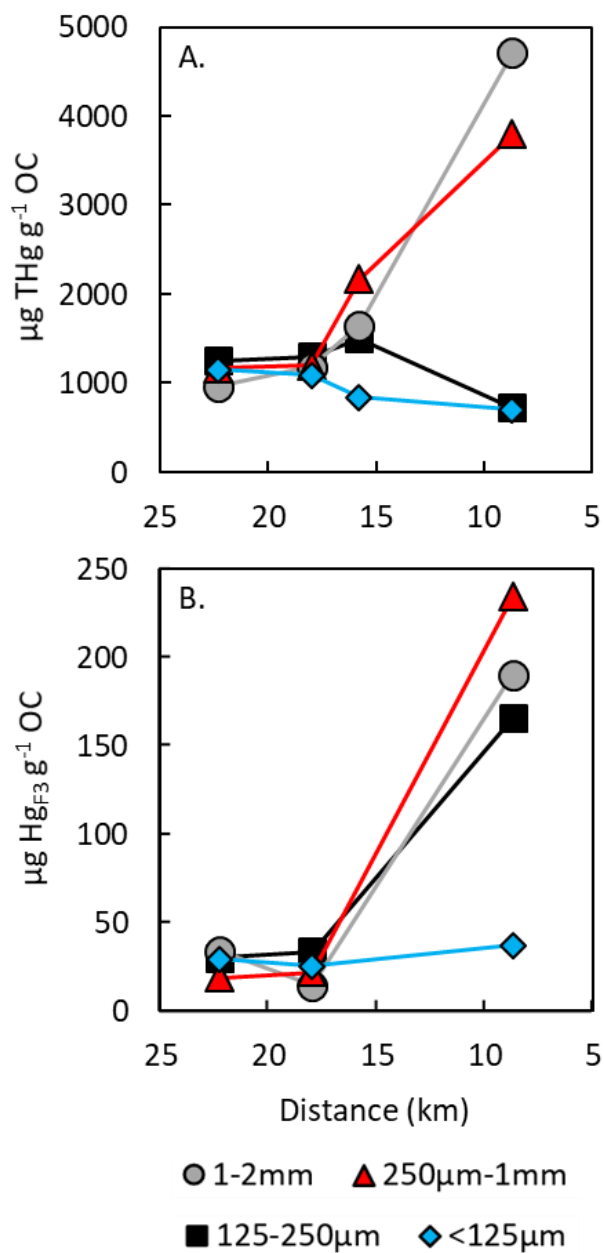

**Figure S6:** Concentrations of (A) total Hg and (B) F3-extracted Hg per mass of organic carbon for EFPC streambed sediment versus distance upstream of the confluence with Poplar Creek.

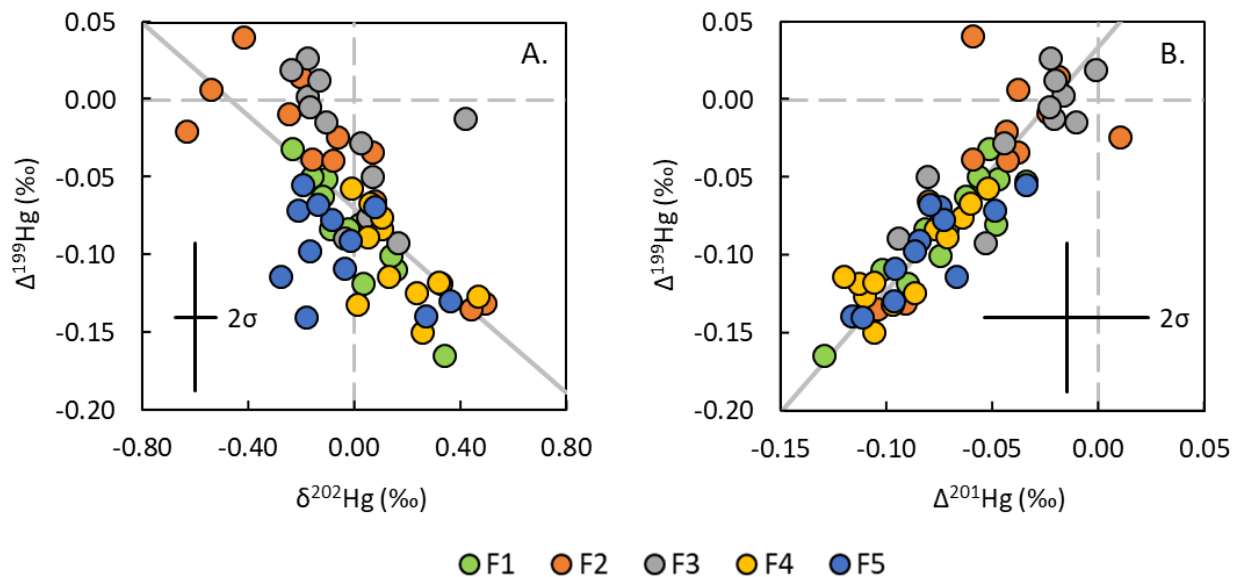

**Figure S7:** Mercury isotopic composition of sequential extractions of EFPC streambed sediment. Shown are (A)  $\Delta^{199}\text{Hg}$  versus  $\delta^{202}\text{Hg}$  and (B)  $\Delta^{199}\text{Hg}$  versus  $\Delta^{201}\text{Hg}$  across all sampling sites and size fractions. Analytical uncertainty in delta values is shown as the average uncertainty (2SD) across all UM-Almadén analyses (see Section 2.5). Using the York regression,<sup>12</sup> the  $\Delta^{199}\text{Hg}/\delta^{202}\text{Hg}$  slope is  $-0.15 (\pm 0.01, 1\text{SE}, n=60)$ , and the  $\Delta^{199}\text{Hg}/\Delta^{201}\text{Hg}$  slope is  $1.57 (\pm 0.16, 1\text{SE}, n=60)$ . Slopes were generated using IsoplotR.<sup>13</sup>

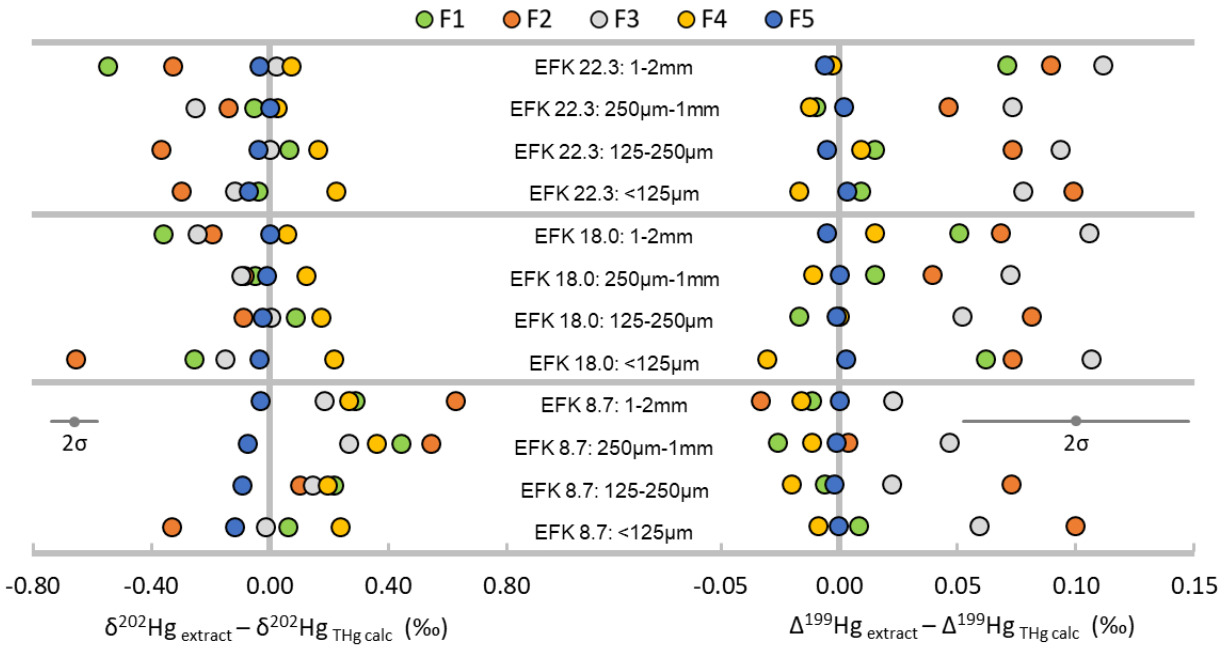

**Figure S8:** Offsets in isotopic composition ( $\delta^{202}\text{Hg}$  and  $\Delta^{199}\text{Hg}$ ) of sequential extractions relative to the isotopic composition of bulk sediment calculated via the weighted average of the five sequential extractions for each sediment size fraction (see Section 2.3). Analytical uncertainty in delta values is shown as the average uncertainty (2SD) across all UM-Almadén analyses (see Section 2.5).

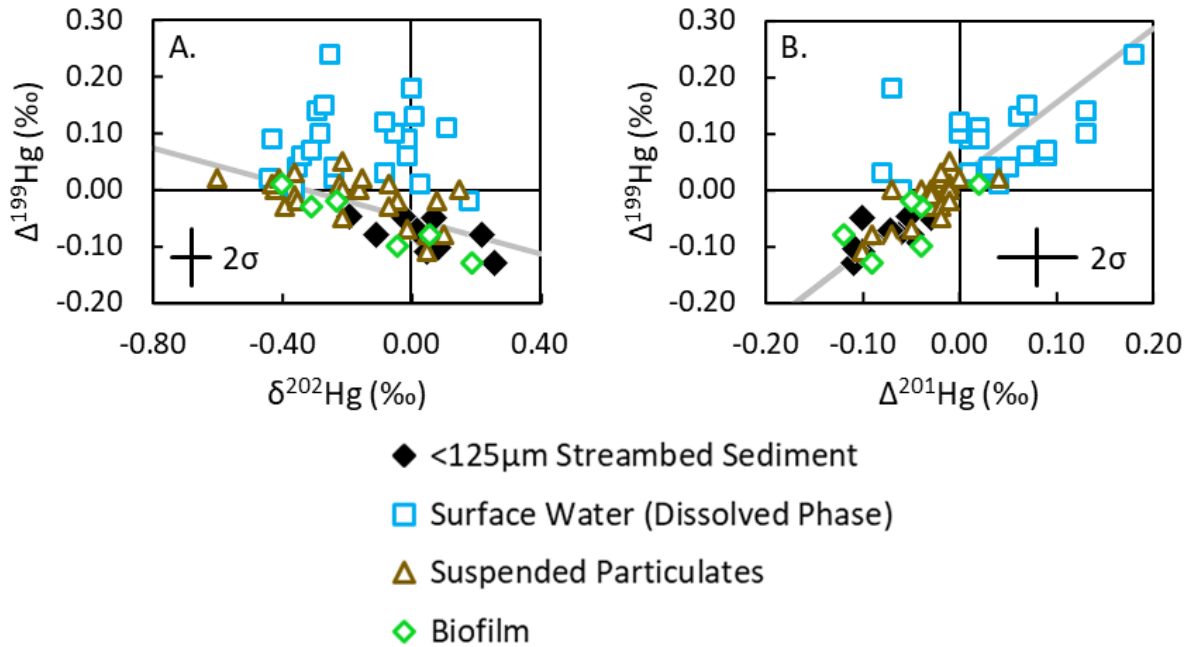

**Figure S9:** Mercury isotopic composition of <125μm streambed sediment (including sediment analyzed in this study as well as by Donovan *et al.*<sup>14</sup>), along with EFPC surface water dissolved phase, suspended particulates, and biofilm analyzed by Demers *et al.*<sup>15</sup> Shown are (A)  $\Delta^{199}\text{Hg}$  versus  $\delta^{202}\text{Hg}$  and (B)  $\Delta^{199}\text{Hg}$  versus  $\Delta^{201}\text{Hg}$ . Analytical uncertainty in delta values is shown as the average uncertainty (2SD) across all UM-Almadén analyses as defined by Demers *et al.*,<sup>15</sup> which is similar to this study, though the analytical uncertainty for sediment analyzed by Donovan *et al.*<sup>14</sup> is somewhat larger. Using the York regression,<sup>12</sup> the  $\Delta^{199}\text{Hg}/\delta^{202}\text{Hg}$  slope for suspended particulates and <125μm streambed sediment combined is  $-0.16 (\pm 0.02, 1\text{SE}, n=34)$ , and the  $\Delta^{199}\text{Hg}/\Delta^{201}\text{Hg}$  slope is  $1.32 (\pm 0.20, 1\text{SE}, n=34)$ . Slopes were generated using IsoplotR.<sup>13</sup>

**Table S1:** Mass and Hg fractions of each grain size of EFPC streambed sediment within each sampling site.<sup>a</sup>

| Site ID  | 1-2mm         |             | 250µm-1mm     |             | 125-250µm     |             | <125µm        |             |
|----------|---------------|-------------|---------------|-------------|---------------|-------------|---------------|-------------|
|          | Mass Fraction | Hg Fraction |
| EFK 22.3 | 42%           | 41%         | 40%           | 33%         | 4%            | 5%          | 14%           | 22%         |
| EFK 18.0 | 42%           | 49%         | 50%           | 39%         | 3%            | 2%          | 5%            | 9%          |
| EFK 15.8 | 40%           | 43%         | 53%           | 51%         | 2%            | 1%          | 5%            | 4%          |
| EFK 8.7  | 43%           | 59%         | 45%           | 34%         | 3%            | 1%          | 9%            | 6%          |

<sup>a</sup>Mass fraction is based on freeze dried masses of each sediment size fraction within each site. Hg fraction is based on THg concentrations (measured via combustion) normalized to the mass fraction of each sediment size fraction within each site. Excludes >2mm sediment.

**Table S2: Mercury isotopic composition of UM-Almadén and procedural standards.<sup>a</sup>**

| Standard Type                                          | n  | $\delta^{204}\text{Hg}$<br>(‰) | 2 $\sigma$<br>(‰) | $\delta^{202}\text{Hg}$<br>(‰) | 2 $\sigma$<br>(‰) | $\delta^{201}\text{Hg}$<br>(‰) | 2 $\sigma$<br>(‰) | $\delta^{200}\text{Hg}$<br>(‰) | 2 $\sigma$<br>(‰) | $\delta^{199}\text{Hg}$<br>(‰) | 2 $\sigma$<br>(‰) | $\Delta^{204}\text{Hg}$<br>(‰) | 2 $\sigma$<br>(‰) | $\Delta^{201}\text{Hg}$<br>(‰) | 2 $\sigma$<br>(‰) | $\Delta^{200}\text{Hg}$<br>(‰) | 2 $\sigma$<br>(‰) | $\Delta^{199}\text{Hg}$<br>(‰) | 2 $\sigma$<br>(‰) |
|--------------------------------------------------------|----|--------------------------------|-------------------|--------------------------------|-------------------|--------------------------------|-------------------|--------------------------------|-------------------|--------------------------------|-------------------|--------------------------------|-------------------|--------------------------------|-------------------|--------------------------------|-------------------|--------------------------------|-------------------|
| UM-Almadén                                             | 25 | -0.83                          | 0.01              | -0.55                          | 0.01              | -0.45                          | 0.01              | -0.27                          | 0.00              | -0.16                          | 0.00              | -0.01                          | 0.01              | -0.04                          | 0.00              | 0.01                           | 0.00              | -0.03                          | 0.00              |
| Purge & Trap<br>NIST SRM 3133                          | 21 | 0.00                           | 0.02              | 0.00                           | 0.02              | 0.00                           | 0.01              | 0.00                           | 0.01              | 0.00                           | 0.01              | 0.00                           | 0.01              | 0.00                           | 0.01              | 0.00                           | 0.01              | 0.00                           | 0.01              |
| NIST SRM 2711<br>(Montana Soil)                        | 2  | -0.27                          | 0.01              | -0.21                          | 0.02              | -0.35                          | 0.02              | -0.12                          | 0.02              | -0.29                          | 0.03              | 0.04                           | 0.05              | -0.19                          | 0.01              | -0.01                          | 0.01              | -0.23                          | 0.02              |
| NIST SRM 2711<br>(Montana Soil)<br>Long-term average   | 11 | -0.28                          | 0.08              | -0.18                          | 0.05              | -0.32                          | 0.04              | -0.10                          | 0.03              | -0.28                          | 0.02              | -0.01                          | 0.03              | -0.19                          | 0.02              | -0.01                          | 0.01              | -0.24                          | 0.01              |
| NIST SRM 1944<br>(NY/NJ Sediment)                      | 1  | -0.65                          | -                 | -0.43                          | -                 | -0.34                          | -                 | -0.21                          | -                 | -0.11                          | -                 | -0.01                          | -                 | -0.01                          | -                 | 0.01                           | -                 | 0.00                           | -                 |
| NIST SRM 1944<br>(NY/NJ Sediment)<br>Long-term average | 62 | -0.65                          | 0.02              | -0.43                          | 0.01              | -0.34                          | 0.01              | -0.21                          | 0.01              | -0.11                          | 0.01              | -0.01                          | 0.01              | -0.02                          | 0.01              | 0.01                           | 0.01              | 0.00                           | 0.01              |

<sup>a</sup> For UM-Almadén, n is the number of preparations (i.e. the number of session averages, with preparations at different concentrations counted separately). For procedural standards, n is the number of completely independent preparations of the material (via purge and trap or combustions). Isotope ratios represent the average value ( $\pm$  2SE) across independent preparations for each standard type. Long-term average isotopic compositions are included for comparison.<sup>7</sup>

**Table S3: Mercury concentration and isotopic composition of EFPC streambed sediment measured via combustion.<sup>a</sup>**

| Site ID  | Size Fraction          | THg ( $\mu\text{g g}^{-1}$ ) | $n_1$ | $n_2$ | $n_3$ | % Rec. | $\delta^{204}\text{Hg}$ (‰) | 2 $\sigma$ (‰) | $\delta^{202}\text{Hg}$ (‰) | 2 $\sigma$ (‰) | $\delta^{201}\text{Hg}$ (‰) | 2 $\sigma$ (‰) | $\delta^{200}\text{Hg}$ (‰) | 2 $\sigma$ (‰) | $\delta^{199}\text{Hg}$ (‰) | 2 $\sigma$ (‰) | $\Delta^{204}\text{Hg}$ (‰) | 2 $\sigma$ (‰) | $\Delta^{201}\text{Hg}$ (‰) | 2 $\sigma$ (‰) | $\Delta^{200}\text{Hg}$ (‰) | 2 $\sigma$ (‰) | $\Delta^{199}\text{Hg}$ (‰) | 2 $\sigma$ (‰) |
|----------|------------------------|------------------------------|-------|-------|-------|--------|-----------------------------|----------------|-----------------------------|----------------|-----------------------------|----------------|-----------------------------|----------------|-----------------------------|----------------|-----------------------------|----------------|-----------------------------|----------------|-----------------------------|----------------|-----------------------------|----------------|
| EFK 22.3 | 1-2mm                  | 21.60                        | 2     | 3     | 9     | 92.8   | 0.00                        | 0.12           | -0.01                       | 0.09           | -0.06                       | 0.07           | -0.01                       | 0.04           | -0.07                       | 0.02           | 0.01                        | 0.01           | -0.06                       | 0.05           | -0.01                       | 0.02           | -0.06                       | 0.02           |
|          | 250 $\mu\text{m}$ -1mm | 18.14                        | 1     | 1     | 3     | 93.5   | -0.18                       | 0.12           | -0.12                       | 0.09           | -0.14                       | 0.07           | -0.05                       | 0.04           | -0.08                       | 0.02           | 0.00                        | 0.01           | -0.05                       | 0.05           | 0.01                        | 0.02           | -0.05                       | 0.02           |
|          | 125-250 $\mu\text{m}$  | 26.15                        | 1     | 1     | 2     | 97.2   | -0.33                       | 0.12           | -0.22                       | 0.09           | -0.22                       | 0.07           | -0.09                       | 0.04           | -0.10                       | 0.02           | -0.01                       | 0.01           | -0.06                       | 0.05           | 0.01                        | 0.02           | -0.05                       | 0.02           |
|          | <125 $\mu\text{m}$     | 35.00                        | 1     | 1     | 2     | 95.5   | -0.26                       | 0.12           | -0.19                       | 0.09           | -0.19                       | 0.07           | -0.09                       | 0.04           | -0.09                       | 0.02           | 0.02                        | 0.01           | -0.05                       | 0.05           | 0.01                        | 0.02           | -0.05                       | 0.02           |
| EFK 18.0 | 1-2mm                  | 24.58                        | 1     | 1     | 2     | 94.1   | 0.34                        | 0.12           | 0.24                        | 0.09           | 0.09                        | 0.07           | 0.10                        | 0.04           | -0.05                       | 0.02           | -0.02                       | 0.01           | -0.09                       | 0.05           | -0.02                       | 0.02           | -0.11                       | 0.02           |
|          | 250 $\mu\text{m}$ -1mm | 16.28                        | 2     | 3     | 7     | 96.6   | -0.03                       | 0.12           | -0.02                       | 0.09           | -0.09                       | 0.07           | -0.02                       | 0.04           | -0.10                       | 0.02           | -0.01                       | 0.01           | -0.07                       | 0.05           | -0.01                       | 0.02           | -0.09                       | 0.02           |
|          | 125-250 $\mu\text{m}$  | 16.75                        | 1     | 1     | 2     | 97.4   | -0.18                       | 0.12           | -0.12                       | 0.09           | -0.16                       | 0.07           | -0.06                       | 0.04           | -0.13                       | 0.02           | 0.00                        | 0.01           | -0.07                       | 0.05           | 0.00                        | 0.02           | -0.10                       | 0.02           |
|          | <125 $\mu\text{m}$     | 39.27                        | 1     | 1     | 3     | 97.7   | -0.14                       | 0.12           | -0.11                       | 0.09           | -0.14                       | 0.07           | -0.05                       | 0.04           | -0.11                       | 0.02           | 0.02                        | 0.01           | -0.06                       | 0.05           | 0.00                        | 0.02           | -0.08                       | 0.02           |
| EFK 15.8 | 1-2mm                  | 26.30                        | 1     | 1     | 3     | 96.1   | 0.18                        | 0.12           | 0.12                        | 0.09           | 0.00                        | 0.07           | 0.06                        | 0.04           | -0.09                       | 0.02           | -0.01                       | 0.01           | -0.10                       | 0.05           | 0.00                        | 0.02           | -0.12                       | 0.02           |
|          | 250 $\mu\text{m}$ -1mm | 23.68                        | 1     | 1     | 2     | 96.9   | -0.13                       | 0.12           | -0.08                       | 0.09           | -0.14                       | 0.07           | -0.03                       | 0.04           | -0.09                       | 0.02           | -0.01                       | 0.01           | -0.08                       | 0.05           | 0.01                        | 0.02           | -0.07                       | 0.02           |
|          | 125-250 $\mu\text{m}$  | 15.07                        | 2     | 3     | 8     | 95.2   | -0.17                       | 0.12           | -0.12                       | 0.09           | -0.16                       | 0.07           | -0.05                       | 0.04           | -0.11                       | 0.02           | 0.00                        | 0.01           | -0.07                       | 0.05           | 0.00                        | 0.02           | -0.08                       | 0.02           |
|          | <125 $\mu\text{m}$     | 21.32                        | 1     | 1     | 2     | 97.3   | 0.01                        | 0.12           | 0.02                        | 0.09           | -0.06                       | 0.07           | 0.01                        | 0.04           | -0.07                       | 0.02           | -0.02                       | 0.01           | -0.07                       | 0.05           | 0.00                        | 0.02           | -0.07                       | 0.02           |
| EFK 8.7  | 1-2mm                  | 41.77                        | 1     | 1     | 2     | 92.1   | -0.35                       | 0.12           | -0.24                       | 0.09           | -0.26                       | 0.07           | -0.10                       | 0.04           | -0.15                       | 0.02           | 0.01                        | 0.01           | -0.08                       | 0.05           | 0.02                        | 0.02           | -0.09                       | 0.02           |
|          | 250 $\mu\text{m}$ -1mm | 23.22                        | 1     | 1     | 4     | 96.2   | -0.28                       | 0.12           | -0.21                       | 0.09           | -0.26                       | 0.07           | -0.09                       | 0.04           | -0.15                       | 0.02           | 0.03                        | 0.01           | -0.10                       | 0.05           | 0.01                        | 0.02           | -0.10                       | 0.02           |
|          | 125-250 $\mu\text{m}$  | 7.14                         | 1     | 1     | 2     | 97.6   | -0.23                       | 0.12           | -0.16                       | 0.09           | -0.21                       | 0.07           | -0.08                       | 0.04           | -0.13                       | 0.02           | 0.01                        | 0.01           | -0.09                       | 0.05           | 0.00                        | 0.02           | -0.09                       | 0.02           |
|          | <125 $\mu\text{m}$     | 20.26                        | 2     | 3     | 6     | 96.2   | 0.14                        | 0.12           | 0.09                        | 0.09           | -0.04                       | 0.07           | 0.03                        | 0.04           | -0.08                       | 0.02           | 0.01                        | 0.01           | -0.11                       | 0.05           | -0.01                       | 0.02           | -0.10                       | 0.02           |

<sup>a</sup> Sieved streambed sediment was collected from four sites along EFPC. Site ID refers to the sampling location identified by the number of kilometers upstream of the confluence of Poplar Creek and EFPC. Here,  $n_1$  denotes the number of sample replicates that were ground independently prior to combustions,  $n_2$  denotes the number of combustion preparations, and  $n_3$  denotes the number of separate isotopic analyses on an individual preparation(s). The percent recovery (% Rec.) shows recovery of Hg during the transfer procedure for preparation of combustion samples for isotope analysis. The uncertainty in the isotopic composition of Hg in combustion samples is represented by the average uncertainty (2SD) across combustion reference material analyses.



**Table S4:** Comparison of combustion replicates.<sup>a</sup>

| Sample ID                          | Replicates | THg<br>( $\mu\text{g g}^{-1}$ ) | $n_1$ | % Rec. | $\delta^{204}\text{Hg}$<br>(‰) | 2 $\sigma$<br>(‰) | $\delta^{202}\text{Hg}$<br>(‰) | 2 $\sigma$<br>(‰) | $\delta^{201}\text{Hg}$<br>(‰) | 2 $\sigma$<br>(‰) | $\delta^{200}\text{Hg}$<br>(‰) | 2 $\sigma$<br>(‰) | $\delta^{199}\text{Hg}$<br>(‰) | 2 $\sigma$<br>(‰) | $\Delta^{204}\text{Hg}$<br>(‰) | 2 $\sigma$<br>(‰) | $\Delta^{201}\text{Hg}$<br>(‰) | 2 $\sigma$<br>(‰) | $\Delta^{200}\text{Hg}$<br>(‰) | 2 $\sigma$<br>(‰) | $\Delta^{199}\text{Hg}$<br>(‰) | 2 $\sigma$<br>(‰) |
|------------------------------------|------------|---------------------------------|-------|--------|--------------------------------|-------------------|--------------------------------|-------------------|--------------------------------|-------------------|--------------------------------|-------------------|--------------------------------|-------------------|--------------------------------|-------------------|--------------------------------|-------------------|--------------------------------|-------------------|--------------------------------|-------------------|
| EFK 22.3<br>1-2mm                  | Rep 1, C1  | 30.32                           | 3     | 94.1   | -0.19                          | 0.12              | -0.14                          | 0.09              | -0.16                          | 0.07              | -0.07                          | 0.04              | -0.09                          | 0.02              | 0.01                           | 0.01              | -0.05                          | 0.05              | 0.00                           | 0.02              | -0.05                          | 0.02              |
|                                    | Rep 1, C2  | 30.20                           | 3     | 92.7   | -0.30                          | 0.12              | -0.20                          | 0.09              | -0.20                          | 0.07              | -0.10                          | 0.04              | -0.08                          | 0.02              | 0.00                           | 0.01              | -0.05                          | 0.05              | 0.00                           | 0.02              | -0.03                          | 0.02              |
|                                    | Rep 2      | 12.94                           | 3     | 92.2   | 0.25                           | 0.12              | 0.15                           | 0.09              | 0.05                           | 0.07              | 0.07                           | 0.04              | -0.05                          | 0.02              | 0.02                           | 0.01              | -0.06                          | 0.05              | -0.01                          | 0.02              | -0.09                          | 0.02              |
| EFK 18.0<br>250 $\mu\text{m}$ -1mm | Rep 1, C1  | 15.98                           | 2     | 99.3   | 0.08                           | 0.12              | 0.04                           | 0.09              | -0.04                          | 0.07              | 0.02                           | 0.04              | -0.09                          | 0.02              | 0.01                           | 0.01              | -0.08                          | 0.05              | 0.00                           | 0.02              | -0.10                          | 0.02              |
|                                    | Rep 1, C2  | 15.65                           | 3     | 96.2   | -0.08                          | 0.12              | -0.06                          | 0.09              | -0.11                          | 0.07              | -0.03                          | 0.04              | -0.10                          | 0.02              | 0.01                           | 0.01              | -0.07                          | 0.05              | 0.00                           | 0.02              | -0.08                          | 0.02              |
|                                    | Rep 2      | 16.75                           | 2     | 95.4   | -0.06                          | 0.12              | -0.02                          | 0.09              | -0.09                          | 0.07              | -0.03                          | 0.04              | -0.10                          | 0.02              | -0.03                          | 0.01              | -0.08                          | 0.05              | -0.01                          | 0.02              | -0.09                          | 0.02              |
| EFK 15.8<br>125-250 $\mu\text{m}$  | Rep 1, C1  | 14.90                           | 3     | 97.6   | -0.19                          | 0.12              | -0.13                          | 0.09              | -0.16                          | 0.07              | -0.06                          | 0.04              | -0.11                          | 0.02              | 0.00                           | 0.01              | -0.06                          | 0.05              | 0.00                           | 0.02              | -0.08                          | 0.02              |
|                                    | Rep 1, C2  | 14.69                           | 3     | 94.2   | -0.19                          | 0.12              | -0.12                          | 0.09              | -0.17                          | 0.07              | -0.05                          | 0.04              | -0.10                          | 0.02              | -0.01                          | 0.01              | -0.08                          | 0.05              | 0.01                           | 0.02              | -0.07                          | 0.02              |
|                                    | Rep 2      | 15.35                           | 2     | 94.6   | -0.15                          | 0.12              | -0.11                          | 0.09              | -0.16                          | 0.07              | -0.05                          | 0.04              | -0.11                          | 0.02              | 0.01                           | 0.01              | -0.07                          | 0.05              | 0.01                           | 0.02              | -0.08                          | 0.02              |
| EFK 8.7<br><125 $\mu\text{m}$      | Rep 1, C1  | 20.30                           | 2     | 98.5   | 0.11                           | 0.12              | 0.06                           | 0.09              | -0.04                          | 0.07              | 0.04                           | 0.04              | -0.09                          | 0.02              | 0.02                           | 0.01              | -0.09                          | 0.05              | 0.01                           | 0.02              | -0.11                          | 0.02              |
|                                    | Rep 1, C2  | 19.92                           | 2     | 93.7   | 0.21                           | 0.12              | 0.13                           | 0.09              | 0.02                           | 0.07              | 0.06                           | 0.04              | -0.07                          | 0.02              | 0.02                           | 0.01              | -0.08                          | 0.05              | -0.01                          | 0.02              | -0.10                          | 0.02              |
|                                    | Rep 2      | 20.41                           | 2     | 96.3   | 0.12                           | 0.12              | 0.08                           | 0.09              | -0.07                          | 0.07              | 0.02                           | 0.04              | -0.09                          | 0.02              | 0.01                           | 0.01              | -0.13                          | 0.05              | -0.02                          | 0.02              | -0.11                          | 0.02              |
| NIST SRM<br>2711<br>(Montana Soil) | Rep 1      | 6.56                            | 3     | 95.9   | -0.27                          | 0.12              | -0.22                          | 0.09              | -0.36                          | 0.07              | -0.13                          | 0.04              | -0.30                          | 0.02              | 0.06                           | 0.01              | -0.19                          | 0.05              | -0.02                          | 0.02              | -0.24                          | 0.02              |
|                                    | Rep 2      | 6.57                            | 3     | 92.7   | -0.28                          | 0.12              | -0.20                          | 0.09              | -0.34                          | 0.07              | -0.11                          | 0.04              | -0.27                          | 0.02              | 0.01                           | 0.01              | -0.19                          | 0.05              | -0.01                          | 0.02              | -0.22                          | 0.02              |

<sup>a</sup> Sieved streambed sediment was collected from four sites along EFPC. Sample ID refers to the sediment size fraction and the sampling location identified by the number of kilometers upstream of the confluence of Poplar Creek and EFPC. Rep 1 and Rep 2 refer to sample replicates that were ground independently prior to combustions. C1 and C2 refer to combustion process replicates, which used aliquots of ground sediment from the same vial. Here,  $n_1$  denotes the number of separate isotopic analyses on an individual preparation. The percent recovery (% Rec.) shows recovery of Hg during the transfer procedure for preparation of combustion samples for isotope analysis. The uncertainty in the isotopic composition of Hg in combustion samples is represented by the average uncertainty (2SD) across combustion reference material analyses.

**Table S5:** Mercury concentration and isotopic composition of sequential extractions of standard reference materials.<sup>a</sup>

| Reference Material                      | Sequential Extraction | THg ( $\mu\text{g g}^{-1}$ ) | % of THg | $n_1$ | $n_2$ | $n_3$ | % Rec. | $\delta^{204}\text{Hg}$ (‰)                 | 2 $\sigma$ (‰) | $\delta^{202}\text{Hg}$ (‰) | 2 $\sigma$ (‰) | $\delta^{201}\text{Hg}$ (‰) | 2 $\sigma$ (‰) | $\delta^{200}\text{Hg}$ (‰) | 2 $\sigma$ (‰) | $\delta^{199}\text{Hg}$ (‰) | 2 $\sigma$ (‰) | $\Delta^{204}\text{Hg}$ (‰) | 2 $\sigma$ (‰) | $\Delta^{201}\text{Hg}$ (‰) | 2 $\sigma$ (‰) | $\Delta^{200}\text{Hg}$ (‰) | 2 $\sigma$ (‰) | $\Delta^{199}\text{Hg}$ (‰) | 2 $\sigma$ (‰) |
|-----------------------------------------|-----------------------|------------------------------|----------|-------|-------|-------|--------|---------------------------------------------|----------------|-----------------------------|----------------|-----------------------------|----------------|-----------------------------|----------------|-----------------------------|----------------|-----------------------------|----------------|-----------------------------|----------------|-----------------------------|----------------|-----------------------------|----------------|
| NIST SRM 2711 (Montana Soil)            | F1                    | 0.07                         | 1.2      | 3     | 4     | 5     | 98.4   | -0.30                                       | 0.12           | -0.21                       | 0.08           | -0.32                       | 0.07           | -0.10                       | 0.05           | -0.25                       | 0.05           | 0.02                        | 0.08           | -0.16                       | 0.04           | 0.00                        | 0.04           | -0.20                       | 0.05           |
|                                         | F2                    | 0.00                         | 0.1      | 2     | 2     | 2     | 96.0   | -1.18                                       | 0.12           | -0.81                       | 0.08           | -0.67                       | 0.07           | -0.35                       | 0.05           | -0.31                       | 0.05           | 0.03                        | 0.08           | -0.06                       | 0.04           | 0.06                        | 0.04           | -0.10                       | 0.05           |
|                                         | F3                    | 0.15                         | 2.6      | 3     | 5     | 9     | 97.5   | -0.36                                       | 0.12           | -0.25                       | 0.08           | -0.33                       | 0.07           | -0.13                       | 0.05           | -0.25                       | 0.05           | 0.00                        | 0.08           | -0.15                       | 0.04           | -0.01                       | 0.04           | -0.19                       | 0.05           |
|                                         | F4                    | 4.07                         | 68.3     | 3     | 4     | 7     | 97.7   | -0.13                                       | 0.12           | -0.09                       | 0.08           | -0.27                       | 0.07           | -0.05                       | 0.05           | -0.25                       | 0.05           | 0.01                        | 0.08           | -0.20                       | 0.04           | 0.00                        | 0.04           | -0.23                       | 0.05           |
|                                         | F5                    | 1.66                         | 27.8     | 3     | 4     | 7     | 98.9   | -0.63                                       | 0.12           | -0.43                       | 0.08           | -0.50                       | 0.07           | -0.22                       | 0.05           | -0.32                       | 0.05           | 0.02                        | 0.08           | -0.18                       | 0.04           | -0.01                       | 0.04           | -0.22                       | 0.05           |
|                                         | Calc. THg             | 5.96                         |          |       |       |       | 95.4   | -0.27                                       | 0.12           | -0.19                       | 0.08           | -0.34                       | 0.07           | -0.10                       | 0.05           | -0.27                       | 0.05           | 0.01                        | 0.08           | -0.19                       | 0.04           | 0.00                        | 0.04           | -0.22                       | 0.05           |
| NIST SRM 1944 (NY/NJ Waterway Sediment) | F1                    | 0.02                         | 0.4      | 1     | 1     | 1     | 95.1   | -0.48                                       | 0.12           | -0.41                       | 0.08           | -0.30                       | 0.07           | -0.07                       | 0.05           | -0.19                       | 0.05           | 0.13                        | 0.08           | 0.00                        | 0.04           | 0.13                        | 0.04           | -0.09                       | 0.05           |
|                                         | F2                    | 0.00                         | <0.1     |       |       |       |        | Insufficient mercury for isotopic analysis. |                |                             |                |                             |                |                             |                |                             |                |                             |                |                             |                |                             |                |                             |                |
|                                         | F3                    | 0.31                         | 8.8      | 1     | 2     | 3     | 95.7   | -0.61                                       | 0.12           | -0.39                       | 0.08           | -0.29                       | 0.07           | -0.19                       | 0.05           | -0.06                       | 0.05           | -0.02                       | 0.08           | 0.01                        | 0.04           | 0.00                        | 0.04           | 0.04                        | 0.05           |
|                                         | F4                    | 2.77                         | 79.6     | 1     | 3     | 4     | 97.5   | -0.58                                       | 0.12           | -0.40                       | 0.08           | -0.31                       | 0.07           | -0.21                       | 0.05           | -0.11                       | 0.05           | 0.02                        | 0.08           | -0.01                       | 0.04           | -0.01                       | 0.04           | -0.01                       | 0.05           |
|                                         | F5                    | 0.39                         | 11.1     | 1     | 2     | 3     | 95.6   | -2.17                                       | 0.12           | -1.46                       | 0.08           | -1.19                       | 0.07           | -0.72                       | 0.05           | -0.49                       | 0.05           | 0.00                        | 0.08           | -0.10                       | 0.04           | 0.01                        | 0.04           | -0.12                       | 0.05           |
|                                         | Calc. THg             | 3.48                         |          |       |       |       | 102.3  | -0.75                                       | 0.12           | -0.52                       | 0.08           | -0.40                       | 0.07           | -0.27                       | 0.05           | -0.15                       | 0.05           | 0.02                        | 0.08           | -0.02                       | 0.04           | -0.01                       | 0.04           | -0.02                       | 0.05           |

<sup>a</sup> Five-step sequential extractions were performed on two standard reference materials. Calc. THg refers to the calculated THg concentration and isotopic composition of the material based on the weighted average of sequential extractions. Here,  $n_1$  denotes the number of sequential extraction sets,  $n_2$  denotes the number of purge and trap preparations, and  $n_3$  denotes the number of separate isotopic analyses on an individual preparation(s). The percent recovery (% Rec.) for F1 – F5 shows recovery of Hg during the purge and trap procedure for preparation of sequential extraction samples for isotope analysis. The percent recovery for Calc. THg is based on the sum of sequential extractions relative to certified values. The uncertainty in the isotopic composition of Hg in sequential extraction samples is represented by the average uncertainty (2SD) across all UM-Almadén analyses.

**Table S6.1: Mercury concentration and isotopic composition of sequential extractions of EFPC streambed sediment at EFK 22.3.<sup>a</sup>**

| Sample ID                              | Sequential Extraction | THg ( $\mu\text{g g}^{-1}$ ) | % of THg | n <sub>1</sub> | n <sub>2</sub> | n <sub>3</sub> | % Rec. | $\delta^{204}\text{Hg}$ (‰) | 2 $\sigma$ (‰) | $\delta^{202}\text{Hg}$ (‰) | 2 $\sigma$ (‰) | $\delta^{201}\text{Hg}$ (‰) | 2 $\sigma$ (‰) | $\delta^{200}\text{Hg}$ (‰) | 2 $\sigma$ (‰) | $\delta^{199}\text{Hg}$ (‰) | 2 $\sigma$ (‰) | $\Delta^{204}\text{Hg}$ (‰) | 2 $\sigma$ (‰) | $\Delta^{201}\text{Hg}$ (‰) | 2 $\sigma$ (‰) | $\Delta^{200}\text{Hg}$ (‰) | 2 $\sigma$ (‰) | $\Delta^{199}\text{Hg}$ (‰) | 2 $\sigma$ (‰) |
|----------------------------------------|-----------------------|------------------------------|----------|----------------|----------------|----------------|--------|-----------------------------|----------------|-----------------------------|----------------|-----------------------------|----------------|-----------------------------|----------------|-----------------------------|----------------|-----------------------------|----------------|-----------------------------|----------------|-----------------------------|----------------|-----------------------------|----------------|
| EFK 22.3<br>1-2mm                      | F1                    | 0.08                         | 0.4      | 1              | 2              | 4              | 91.5   | -0.23                       | 0.12           | -0.15                       | 0.08           | -0.15                       | 0.07           | -0.09                       | 0.05           | -0.09                       | 0.05           | 0.00                        | 0.08           | -0.03                       | 0.04           | -0.01                       | 0.04           | -0.05                       | 0.05           |
|                                        | F2                    | 0.09                         | 0.5      | 1              | 2              | 5              | 96.0   | 0.07                        | 0.12           | 0.07                        | 0.08           | 0.01                        | 0.07           | 0.05                        | 0.05           | -0.02                       | 0.05           | -0.03                       | 0.08           | -0.04                       | 0.04           | 0.01                        | 0.04           | -0.03                       | 0.05           |
|                                        | F3                    | 0.75                         | 3.8      | 1              | 1              | 2              | 101.5  | 0.57                        | 0.12           | 0.42                        | 0.08           | 0.29                        | 0.07           | 0.22                        | 0.05           | 0.09                        | 0.05           | -0.06                       | 0.08           | -0.02                       | 0.04           | 0.01                        | 0.04           | -0.01                       | 0.05           |
|                                        | F4                    | 6.73                         | 34.4     | 1              | 1              | 2              | 96.7   | 0.71                        | 0.12           | 0.47                        | 0.08           | 0.24                        | 0.07           | 0.22                        | 0.05           | -0.01                       | 0.05           | 0.01                        | 0.08           | -0.11                       | 0.04           | -0.02                       | 0.04           | -0.13                       | 0.05           |
|                                        | F5                    | 11.92                        | 60.9     | 1              | 1              | 2              | 93.7   | 0.55                        | 0.12           | 0.36                        | 0.08           | 0.18                        | 0.07           | 0.17                        | 0.05           | -0.04                       | 0.05           | 0.01                        | 0.08           | -0.10                       | 0.04           | -0.01                       | 0.04           | -0.13                       | 0.05           |
|                                        | Calc. THg             | 19.57                        |          |                |                |                | 90.6   | 0.60                        | 0.12           | 0.40                        | 0.08           | 0.20                        | 0.07           | 0.19                        | 0.05           | -0.02                       | 0.05           | 0.00                        | 0.08           | -0.10                       | 0.04           | -0.01                       | 0.04           | -0.12                       | 0.05           |
| EFK 22.3<br>250 $\mu\text{m}$ -<br>1mm | F1                    | 0.31                         | 1.6      | 1              | 1              | 2              | 96.8   | 0.01                        | 0.12           | 0.02                        | 0.08           | -0.03                       | 0.07           | 0.00                        | 0.05           | -0.07                       | 0.05           | -0.02                       | 0.08           | -0.05                       | 0.04           | -0.01                       | 0.04           | -0.08                       | 0.05           |
|                                        | F2                    | 0.01                         | <0.1     | 1              | 1              | 1              | 97.2   | -0.08                       | 0.12           | -0.07                       | 0.08           | -0.04                       | 0.07           | -0.05                       | 0.05           | -0.04                       | 0.05           | 0.02                        | 0.08           | 0.01                        | 0.04           | -0.01                       | 0.04           | -0.02                       | 0.05           |
|                                        | F3                    | 0.29                         | 1.5      | 1              | 2              | 5              | 96.6   | -0.28                       | 0.12           | -0.18                       | 0.08           | -0.15                       | 0.07           | -0.07                       | 0.05           | -0.04                       | 0.05           | -0.01                       | 0.08           | -0.02                       | 0.04           | 0.02                        | 0.04           | 0.00                        | 0.05           |
|                                        | F4                    | 3.49                         | 18.4     | 1              | 1              | 2              | 95.8   | 0.14                        | 0.12           | 0.10                        | 0.08           | 0.00                        | 0.07           | 0.03                        | 0.05           | -0.06                       | 0.05           | -0.02                       | 0.08           | -0.08                       | 0.04           | -0.02                       | 0.04           | -0.08                       | 0.05           |
|                                        | F5                    | 14.83                        | 78.4     | 1              | 1              | 2              | 99.5   | 0.11                        | 0.12           | 0.08                        | 0.08           | -0.02                       | 0.07           | 0.04                        | 0.05           | -0.05                       | 0.05           | 0.00                        | 0.08           | -0.07                       | 0.04           | 0.00                        | 0.04           | -0.07                       | 0.05           |
|                                        | Calc. THg             | 18.92                        |          |                |                |                | 104.3  | 0.11                        | 0.12           | 0.08                        | 0.08           | -0.02                       | 0.07           | 0.03                        | 0.05           | -0.05                       | 0.05           | -0.01                       | 0.08           | -0.07                       | 0.04           | -0.01                       | 0.04           | -0.07                       | 0.05           |
| EFK 22.3<br>125-<br>250 $\mu\text{m}$  | F1                    | 0.15                         | 0.6      | 1              | 1              | 2              | 98.5   | -0.18                       | 0.12           | -0.11                       | 0.08           | -0.13                       | 0.07           | -0.04                       | 0.05           | -0.08                       | 0.05           | -0.02                       | 0.08           | -0.05                       | 0.04           | 0.01                        | 0.04           | -0.05                       | 0.05           |
|                                        | F2                    | 0.00                         | <0.1     | 1              | 1              | 1              | 98.9   | -0.82                       | 0.12           | -0.54                       | 0.08           | -0.45                       | 0.07           | -0.26                       | 0.05           | -0.13                       | 0.05           | -0.01                       | 0.08           | -0.04                       | 0.04           | 0.01                        | 0.04           | 0.01                        | 0.05           |
|                                        | F3                    | 0.62                         | 2.4      | 1              | 1              | 2              | 96.3   | -0.28                       | 0.12           | -0.18                       | 0.08           | -0.16                       | 0.07           | -0.06                       | 0.05           | -0.02                       | 0.05           | -0.02                       | 0.08           | -0.02                       | 0.04           | 0.03                        | 0.04           | 0.03                        | 0.05           |
|                                        | F4                    | 5.22                         | 19.7     | 1              | 1              | 2              | 97.6   | -0.04                       | 0.12           | -0.01                       | 0.08           | -0.06                       | 0.07           | 0.01                        | 0.05           | -0.06                       | 0.05           | -0.02                       | 0.08           | -0.05                       | 0.04           | 0.01                        | 0.04           | -0.06                       | 0.05           |
|                                        | F5                    | 20.48                        | 77.3     | 1              | 2              | 5              | 95.3   | -0.29                       | 0.12           | -0.21                       | 0.08           | -0.21                       | 0.07           | -0.10                       | 0.05           | -0.13                       | 0.05           | 0.03                        | 0.08           | -0.05                       | 0.04           | 0.01                        | 0.04           | -0.07                       | 0.05           |
|                                        | Calc. THg             | 26.48                        |          |                |                |                | 101.3  | -0.24                       | 0.12           | -0.17                       | 0.08           | -0.18                       | 0.07           | -0.08                       | 0.05           | -0.11                       | 0.05           | 0.02                        | 0.08           | -0.05                       | 0.04           | 0.01                        | 0.04           | -0.07                       | 0.05           |
| EFK 22.3<br><125 $\mu\text{m}$         | F1                    | 0.07                         | 0.2      | 1              | 2              | 4              | 97.5   | -0.25                       | 0.12           | -0.16                       | 0.08           | -0.18                       | 0.07           | -0.08                       | 0.05           | -0.09                       | 0.05           | -0.01                       | 0.08           | -0.06                       | 0.04           | 0.00                        | 0.04           | -0.05                       | 0.05           |
|                                        | F2                    | 0.01                         | <0.1     | 1              | 1              | 1              | 96.5   | -0.67                       | 0.12           | -0.42                       | 0.08           | -0.38                       | 0.07           | -0.20                       | 0.05           | -0.07                       | 0.05           | -0.04                       | 0.08           | -0.06                       | 0.04           | 0.02                        | 0.04           | 0.04                        | 0.05           |
|                                        | F3                    | 0.89                         | 2.6      | 1              | 1              | 2              | 102.5  | -0.33                       | 0.12           | -0.24                       | 0.08           | -0.18                       | 0.07           | -0.11                       | 0.05           | -0.04                       | 0.05           | 0.03                        | 0.08           | 0.00                        | 0.04           | 0.01                        | 0.04           | 0.02                        | 0.05           |
|                                        | F4                    | 8.57                         | 25.3     | 1              | 2              | 4              | 96.8   | 0.14                        | 0.12           | 0.10                        | 0.08           | 0.01                        | 0.07           | 0.05                        | 0.05           | -0.05                       | 0.05           | -0.02                       | 0.08           | -0.06                       | 0.04           | 0.00                        | 0.04           | -0.08                       | 0.05           |
|                                        | F5                    | 24.31                        | 71.8     | 1              | 1              | 2              | 95.9   | -0.30                       | 0.12           | -0.19                       | 0.08           | -0.18                       | 0.07           | -0.10                       | 0.05           | -0.10                       | 0.05           | -0.01                       | 0.08           | -0.03                       | 0.04           | 0.00                        | 0.04           | -0.05                       | 0.05           |
|                                        | Calc. THg             | 33.85                        |          |                |                |                | 96.7   | -0.19                       | 0.12           | -0.12                       | 0.08           | -0.13                       | 0.07           | -0.06                       | 0.05           | -0.09                       | 0.05           | -0.01                       | 0.08           | -0.04                       | 0.04           | 0.00                        | 0.04           | -0.06                       | 0.05           |

<sup>a</sup> See Table S6.3 for notes.

**Table S6.2:** Mercury concentration and isotopic composition of sequential extractions of EFPC streambed sediment at EFK 18.0.<sup>a</sup>

| Sample ID                              | Sequential Extraction | THg ( $\mu\text{g g}^{-1}$ ) | % of THg | $n_1$ | $n_2$ | $n_3$ | % Rec. | $\delta^{204}\text{Hg}$ (‰) | $2\sigma$ (‰) | $\delta^{202}\text{Hg}$ (‰) | $2\sigma$ (‰) | $\delta^{201}\text{Hg}$ (‰) | $2\sigma$ (‰) | $\delta^{200}\text{Hg}$ (‰) | $2\sigma$ (‰) | $\delta^{199}\text{Hg}$ (‰) | $2\sigma$ (‰) | $\Delta^{204}\text{Hg}$ (‰) | $2\sigma$ (‰) | $\Delta^{201}\text{Hg}$ (‰) | $2\sigma$ (‰) | $\Delta^{200}\text{Hg}$ (‰) | $2\sigma$ (‰) | $\Delta^{199}\text{Hg}$ (‰) | $2\sigma$ (‰) |
|----------------------------------------|-----------------------|------------------------------|----------|-------|-------|-------|--------|-----------------------------|---------------|-----------------------------|---------------|-----------------------------|---------------|-----------------------------|---------------|-----------------------------|---------------|-----------------------------|---------------|-----------------------------|---------------|-----------------------------|---------------|-----------------------------|---------------|
| EFK 18.0<br>1-2mm                      | F1                    | 0.10                         | 0.6      | 1     | 1     | 2     | 99.6   | -0.13                       | 0.12          | -0.09                       | 0.08          | -0.15                       | 0.07          | -0.07                       | 0.05          | -0.11                       | 0.05          | 0.01                        | 0.08          | -0.08                       | 0.04          | -0.03                       | 0.04          | -0.08                       | 0.05          |
|                                        | F2                    | 0.02                         | 0.1      | 1     | 2     | 2     | 96.6   | 0.10                        | 0.12          | 0.08                        | 0.08          | -0.02                       | 0.07          | 0.04                        | 0.05          | -0.05                       | 0.05          | -0.01                       | 0.08          | -0.08                       | 0.04          | 0.00                        | 0.04          | -0.06                       | 0.05          |
|                                        | F3                    | 0.30                         | 1.7      | 1     | 1     | 2     | 101.4  | 0.03                        | 0.12          | 0.02                        | 0.08          | -0.03                       | 0.07          | 0.01                        | 0.05          | -0.02                       | 0.05          | -0.01                       | 0.08          | -0.04                       | 0.04          | 0.00                        | 0.04          | -0.03                       | 0.05          |
|                                        | F4                    | 2.70                         | 15.6     | 1     | 1     | 2     | 101.0  | 0.47                        | 0.12          | 0.33                        | 0.08          | 0.13                        | 0.07          | 0.14                        | 0.05          | -0.04                       | 0.05          | -0.02                       | 0.08          | -0.11                       | 0.04          | -0.02                       | 0.04          | -0.12                       | 0.05          |
|                                        | F5                    | 14.19                        | 82.0     | 1     | 1     | 2     | 104.0  | 0.37                        | 0.12          | 0.27                        | 0.08          | 0.09                        | 0.07          | 0.12                        | 0.05          | -0.07                       | 0.05          | -0.03                       | 0.08          | -0.12                       | 0.04          | -0.02                       | 0.04          | -0.14                       | 0.05          |
|                                        | Calc. THg             | 17.31                        |          |       |       |       | 70.4   | 0.38                        | 0.12          | 0.27                        | 0.08          | 0.09                        | 0.07          | 0.12                        | 0.05          | -0.06                       | 0.05          | -0.03                       | 0.08          | -0.11                       | 0.04          | -0.02                       | 0.04          | -0.13                       | 0.05          |
| EFK 18.0<br>250 $\mu\text{m}$ -<br>1mm | F1                    | 0.23                         | 1.3      | 2     | 2     | 4     | 100.4  | -0.16                       | 0.12          | -0.12                       | 0.08          | -0.15                       | 0.07          | -0.06                       | 0.05          | -0.09                       | 0.05          | 0.02                        | 0.08          | -0.06                       | 0.04          | 0.01                        | 0.04          | -0.06                       | 0.05          |
|                                        | F2                    | 0.01                         | 0.1      | 2     | 2     | 2     | 97.2   | -0.25                       | 0.12          | -0.16                       | 0.08          | -0.18                       | 0.07          | -0.08                       | 0.05          | -0.08                       | 0.05          | -0.01                       | 0.08          | -0.06                       | 0.04          | 0.00                        | 0.04          | -0.04                       | 0.05          |
|                                        | F3                    | 0.29                         | 1.7      | 2     | 2     | 4     | 99.9   | -0.26                       | 0.12          | -0.17                       | 0.08          | -0.15                       | 0.07          | -0.06                       | 0.05          | -0.05                       | 0.05          | -0.01                       | 0.08          | -0.02                       | 0.04          | 0.02                        | 0.04          | 0.00                        | 0.05          |
|                                        | F4                    | 1.97                         | 11.6     | 2     | 3     | 7     | 98.7   | 0.08                        | 0.12          | 0.05                        | 0.08          | -0.03                       | 0.07          | 0.02                        | 0.05          | -0.08                       | 0.05          | 0.01                        | 0.08          | -0.07                       | 0.04          | 0.00                        | 0.04          | -0.09                       | 0.05          |
|                                        | F5                    | 14.43                        | 85.2     | 2     | 2     | 4     | 100.2  | -0.14                       | 0.12          | -0.08                       | 0.08          | -0.14                       | 0.07          | -0.04                       | 0.05          | -0.10                       | 0.05          | -0.02                       | 0.08          | -0.07                       | 0.04          | 0.00                        | 0.04          | -0.08                       | 0.05          |
|                                        | Calc. THg             | 16.93                        |          |       |       |       | 104.0  | -0.12                       | 0.12          | -0.07                       | 0.08          | -0.12                       | 0.07          | -0.04                       | 0.05          | -0.09                       | 0.05          | -0.01                       | 0.08          | -0.07                       | 0.04          | 0.00                        | 0.04          | -0.08                       | 0.05          |
| EFK 18.0<br>125-<br>250 $\mu\text{m}$  | F1                    | 0.11                         | 0.7      | 1     | 2     | 5     | 99.5   | -0.05                       | 0.12          | -0.02                       | 0.08          | -0.09                       | 0.07          | -0.01                       | 0.05          | -0.09                       | 0.05          | -0.01                       | 0.08          | -0.07                       | 0.04          | 0.00                        | 0.04          | -0.08                       | 0.05          |
|                                        | F2                    | 0.00                         | <0.1     | 1     | 1     | 1     | 96.7   | -0.34                       | 0.12          | -0.20                       | 0.08          | -0.17                       | 0.07          | -0.11                       | 0.05          | -0.04                       | 0.05          | -0.04                       | 0.08          | -0.02                       | 0.04          | 0.00                        | 0.04          | 0.02                        | 0.05          |
|                                        | F3                    | 0.43                         | 2.5      | 1     | 1     | 2     | 99.0   | -0.14                       | 0.12          | -0.11                       | 0.08          | -0.09                       | 0.07          | -0.04                       | 0.05          | -0.04                       | 0.05          | 0.02                        | 0.08          | -0.01                       | 0.04          | 0.02                        | 0.04          | -0.01                       | 0.05          |
|                                        | F4                    | 2.16                         | 12.6     | 1     | 1     | 2     | 97.3   | 0.07                        | 0.12          | 0.06                        | 0.08          | -0.02                       | 0.07          | 0.03                        | 0.05          | -0.05                       | 0.05          | -0.01                       | 0.08          | -0.06                       | 0.04          | 0.00                        | 0.04          | -0.07                       | 0.05          |
|                                        | F5                    | 14.40                        | 84.2     | 1     | 1     | 2     | 100.0  | -0.19                       | 0.12          | -0.14                       | 0.08          | -0.18                       | 0.07          | -0.08                       | 0.05          | -0.10                       | 0.05          | 0.01                        | 0.08          | -0.08                       | 0.04          | -0.01                       | 0.04          | -0.07                       | 0.05          |
|                                        | Calc. THg             | 17.11                        |          |       |       |       | 102.1  | -0.16                       | 0.12          | -0.11                       | 0.08          | -0.16                       | 0.07          | -0.06                       | 0.05          | -0.09                       | 0.05          | 0.01                        | 0.08          | -0.08                       | 0.04          | -0.01                       | 0.04          | -0.07                       | 0.05          |
| EFK 18.0<br><125 $\mu\text{m}$         | F1                    | 0.04                         | 0.1      | 1     | 1     | 2     | 99.2   | -0.37                       | 0.12          | -0.24                       | 0.08          | -0.23                       | 0.07          | -0.11                       | 0.05          | -0.09                       | 0.05          | -0.02                       | 0.08          | -0.05                       | 0.04          | 0.01                        | 0.04          | -0.03                       | 0.05          |
|                                        | F2                    | 0.01                         | <0.1     | 1     | 1     | 1     | 96.9   | -0.95                       | 0.12          | -0.64                       | 0.08          | -0.52                       | 0.07          | -0.33                       | 0.05          | -0.18                       | 0.05          | -0.01                       | 0.08          | -0.04                       | 0.04          | -0.01                       | 0.04          | -0.02                       | 0.05          |
|                                        | F3                    | 0.91                         | 2.2      | 1     | 1     | 2     | 98.7   | -0.23                       | 0.12          | -0.13                       | 0.08          | -0.12                       | 0.07          | -0.04                       | 0.05          | -0.02                       | 0.05          | -0.03                       | 0.08          | -0.02                       | 0.04          | 0.02                        | 0.04          | 0.01                        | 0.05          |
|                                        | F4                    | 6.29                         | 15.4     | 1     | 1     | 2     | 99.8   | 0.34                        | 0.12          | 0.24                        | 0.08          | 0.09                        | 0.07          | 0.11                        | 0.05          | -0.06                       | 0.05          | -0.01                       | 0.08          | -0.09                       | 0.04          | -0.01                       | 0.04          | -0.12                       | 0.05          |
|                                        | F5                    | 33.52                        | 82.2     | 1     | 2     | 5     | 100.6  | -0.03                       | 0.12          | -0.01                       | 0.08          | -0.10                       | 0.07          | -0.02                       | 0.05          | -0.09                       | 0.05          | -0.01                       | 0.08          | -0.08                       | 0.04          | -0.01                       | 0.04          | -0.09                       | 0.05          |
|                                        | Calc. THg             | 40.76                        |          |       |       |       | 103.8  | 0.02                        | 0.12          | 0.02                        | 0.08          | -0.07                       | 0.07          | 0.00                        | 0.05          | -0.09                       | 0.05          | -0.01                       | 0.08          | -0.08                       | 0.04          | -0.01                       | 0.04          | -0.09                       | 0.05          |

<sup>a</sup> See Table S6.3 for notes.

**Table S6.3: Mercury concentration and isotopic composition of sequential extractions of EFPC streambed sediment at EFK 8.7.<sup>a</sup>**

| Sample ID                             | Sequential Extraction | THg ( $\mu\text{g g}^{-1}$ ) | % of THg | $n_1$ | $n_2$ | $n_3$ | % Rec. | $\delta^{204}\text{Hg}$ (‰) | $2\sigma$ (‰) | $\delta^{202}\text{Hg}$ (‰) | $2\sigma$ (‰) | $\delta^{201}\text{Hg}$ (‰) | $2\sigma$ (‰) | $\delta^{200}\text{Hg}$ (‰) | $2\sigma$ (‰) | $\delta^{199}\text{Hg}$ (‰) | $2\sigma$ (‰) | $\Delta^{204}\text{Hg}$ (‰) | $2\sigma$ (‰) | $\Delta^{201}\text{Hg}$ (‰) | $2\sigma$ (‰) | $\Delta^{200}\text{Hg}$ (‰) | $2\sigma$ (‰) | $\Delta^{199}\text{Hg}$ (‰) | $2\sigma$ (‰) |
|---------------------------------------|-----------------------|------------------------------|----------|-------|-------|-------|--------|-----------------------------|---------------|-----------------------------|---------------|-----------------------------|---------------|-----------------------------|---------------|-----------------------------|---------------|-----------------------------|---------------|-----------------------------|---------------|-----------------------------|---------------|-----------------------------|---------------|
| EFK 8.7<br>1-2mm                      | F1                    | 0.20                         | 0.6      | 1     | 2     | 4     | 104.8  | 0.24                        | 0.12          | 0.15                        | 0.08          | 0.01                        | 0.07          | 0.08                        | 0.05          | -0.07                       | 0.05          | 0.00                        | 0.08          | -0.10                       | 0.04          | 0.00                        | 0.04          | -0.11                       | 0.05          |
|                                       | F2                    | 0.04                         | 0.1      | 1     | 2     | 2     | 101.0  | 0.78                        | 0.12          | 0.49                        | 0.08          | 0.28                        | 0.07          | 0.26                        | 0.05          | -0.01                       | 0.05          | 0.05                        | 0.08          | -0.09                       | 0.04          | 0.02                        | 0.04          | -0.13                       | 0.05          |
|                                       | F3                    | 1.68                         | 5.3      | 1     | 1     | 2     | 105.1  | 0.03                        | 0.12          | 0.05                        | 0.08          | -0.04                       | 0.07          | 0.03                        | 0.05          | -0.06                       | 0.05          | -0.04                       | 0.08          | -0.07                       | 0.04          | 0.01                        | 0.04          | -0.07                       | 0.05          |
|                                       | F4                    | 2.05                         | 6.5      | 1     | 1     | 2     | 102.5  | 0.22                        | 0.12          | 0.13                        | 0.08          | -0.02                       | 0.07          | 0.07                        | 0.05          | -0.08                       | 0.05          | 0.02                        | 0.08          | -0.12                       | 0.04          | 0.00                        | 0.04          | -0.11                       | 0.05          |
|                                       | F5                    | 27.80                        | 87.5     | 1     | 1     | 2     | 107.7  | -0.26                       | 0.12          | -0.17                       | 0.08          | -0.21                       | 0.07          | -0.09                       | 0.05          | -0.14                       | 0.05          | -0.01                       | 0.08          | -0.09                       | 0.04          | -0.01                       | 0.04          | -0.10                       | 0.05          |
|                                       | Calc. THg             | 31.77                        |          |       |       |       | 76.1   | -0.21                       | 0.12          | -0.13                       | 0.08          | -0.19                       | 0.07          | -0.07                       | 0.05          | -0.13                       | 0.05          | -0.01                       | 0.08          | -0.09                       | 0.04          | 0.00                        | 0.04          | -0.10                       | 0.05          |
| EFK 8.7<br>250 $\mu\text{m}$ -<br>1mm | F1                    | 0.24                         | 1.0      | 1     | 2     | 5     | 104.7  | 0.54                        | 0.12          | 0.34                        | 0.08          | 0.13                        | 0.07          | 0.14                        | 0.05          | -0.08                       | 0.05          | 0.03                        | 0.08          | -0.13                       | 0.04          | -0.03                       | 0.04          | -0.16                       | 0.05          |
|                                       | F2                    | 0.02                         | 0.1      | 1     | 1     | 1     | 101.0  | 0.74                        | 0.12          | 0.44                        | 0.08          | 0.23                        | 0.07          | 0.23                        | 0.05          | -0.02                       | 0.05          | 0.08                        | 0.08          | -0.10                       | 0.04          | 0.01                        | 0.04          | -0.13                       | 0.05          |
|                                       | F3                    | 1.43                         | 5.9      | 1     | 1     | 2     | 105.6  | 0.25                        | 0.12          | 0.16                        | 0.08          | 0.07                        | 0.07          | 0.08                        | 0.05          | -0.05                       | 0.05          | 0.01                        | 0.08          | -0.05                       | 0.04          | -0.01                       | 0.04          | -0.09                       | 0.05          |
|                                       | F4                    | 2.89                         | 11.8     | 1     | 1     | 2     | 103.9  | 0.36                        | 0.12          | 0.26                        | 0.08          | 0.09                        | 0.07          | 0.11                        | 0.05          | -0.08                       | 0.05          | -0.02                       | 0.08          | -0.11                       | 0.04          | -0.02                       | 0.04          | -0.15                       | 0.05          |
|                                       | F5                    | 19.84                        | 81.3     | 1     | 1     | 2     | 105.3  | -0.27                       | 0.12          | -0.18                       | 0.08          | -0.25                       | 0.07          | -0.12                       | 0.05          | -0.18                       | 0.05          | 0.00                        | 0.08          | -0.11                       | 0.04          | -0.03                       | 0.04          | -0.14                       | 0.05          |
|                                       | Calc. THg             | 24.41                        |          |       |       |       | 105.2  | -0.15                       | 0.12          | -0.10                       | 0.08          | -0.18                       | 0.07          | -0.08                       | 0.05          | -0.16                       | 0.05          | 0.00                        | 0.08          | -0.11                       | 0.04          | -0.02                       | 0.04          | -0.14                       | 0.05          |
| EFK 8.7<br>125-<br>250 $\mu\text{m}$  | F1                    | 0.05                         | 0.6      | 1     | 1     | 2     | 103.8  | 0.08                        | 0.12          | 0.03                        | 0.08          | -0.06                       | 0.07          | -0.01                       | 0.05          | -0.11                       | 0.05          | 0.03                        | 0.08          | -0.09                       | 0.04          | -0.02                       | 0.04          | -0.12                       | 0.05          |
|                                       | F2                    | 0.00                         | <0.1     | 1     | 1     | 1     | 93.9   | -0.13                       | 0.12          | -0.08                       | 0.08          | -0.10                       | 0.07          | -0.11                       | 0.05          | -0.06                       | 0.05          | 0.00                        | 0.08          | -0.04                       | 0.04          | -0.06                       | 0.04          | -0.04                       | 0.05          |
|                                       | F3                    | 1.62                         | 20.5     | 1     | 1     | 2     | 103.9  | -0.03                       | 0.12          | -0.04                       | 0.08          | -0.12                       | 0.07          | -0.02                       | 0.05          | -0.10                       | 0.05          | 0.03                        | 0.08          | -0.09                       | 0.04          | 0.00                        | 0.04          | -0.09                       | 0.05          |
|                                       | F4                    | 1.22                         | 15.4     | 1     | 2     | 5     | 105.2  | 0.04                        | 0.12          | 0.01                        | 0.08          | -0.09                       | 0.07          | 0.00                        | 0.05          | -0.13                       | 0.05          | 0.02                        | 0.08          | -0.10                       | 0.04          | 0.00                        | 0.04          | -0.13                       | 0.05          |
|                                       | F5                    | 4.99                         | 63.4     | 1     | 1     | 2     | 106.0  | -0.37                       | 0.12          | -0.28                       | 0.08          | -0.28                       | 0.07          | -0.14                       | 0.05          | -0.18                       | 0.05          | 0.05                        | 0.08          | -0.07                       | 0.04          | 0.00                        | 0.04          | -0.11                       | 0.05          |
|                                       | Calc. THg             | 7.88                         |          |       |       |       | 110.4  | -0.23                       | 0.12          | -0.18                       | 0.08          | -0.21                       | 0.07          | -0.10                       | 0.05          | -0.16                       | 0.05          | 0.04                        | 0.08          | -0.08                       | 0.04          | 0.00                        | 0.04          | -0.11                       | 0.05          |
| EFK 8.7<br><125 $\mu\text{m}$         | F1                    | 0.08                         | 0.4      | 1     | 1     | 2     | 105.4  | 0.20                        | 0.12          | 0.14                        | 0.08          | 0.03                        | 0.07          | 0.07                        | 0.05          | -0.06                       | 0.05          | -0.01                       | 0.08          | -0.07                       | 0.04          | 0.00                        | 0.04          | -0.10                       | 0.05          |
|                                       | F2                    | 0.01                         | <0.1     | 1     | 1     | 1     | 99.8   | -0.36                       | 0.12          | -0.25                       | 0.08          | -0.21                       | 0.07          | -0.12                       | 0.05          | -0.07                       | 0.05          | 0.02                        | 0.08          | -0.02                       | 0.04          | 0.01                        | 0.04          | -0.01                       | 0.05          |
|                                       | F3                    | 1.07                         | 5.4      | 1     | 1     | 2     | 105.3  | 0.12                        | 0.12          | 0.07                        | 0.08          | -0.03                       | 0.07          | 0.02                        | 0.05          | -0.03                       | 0.05          | 0.02                        | 0.08          | -0.08                       | 0.04          | -0.01                       | 0.04          | -0.05                       | 0.05          |
|                                       | F4                    | 6.31                         | 31.7     | 1     | 1     | 2     | 104.5  | 0.49                        | 0.12          | 0.32                        | 0.08          | 0.13                        | 0.07          | 0.16                        | 0.05          | -0.04                       | 0.05          | 0.01                        | 0.08          | -0.11                       | 0.04          | 0.00                        | 0.04          | -0.12                       | 0.05          |
|                                       | F5                    | 12.43                        | 62.5     | 1     | 2     | 5     | 102.9  | -0.03                       | 0.12          | -0.04                       | 0.08          | -0.12                       | 0.07          | -0.03                       | 0.05          | -0.12                       | 0.05          | 0.02                        | 0.08          | -0.10                       | 0.04          | -0.01                       | 0.04          | -0.11                       | 0.05          |
|                                       | Calc. THg             | 19.90                        |          |       |       |       | 98.2   | 0.14                        | 0.12          | 0.08                        | 0.08          | -0.04                       | 0.07          | 0.03                        | 0.05          | -0.09                       | 0.05          | 0.02                        | 0.08          | -0.10                       | 0.04          | -0.01                       | 0.04          | -0.11                       | 0.05          |

<sup>a</sup> Five-step sequential extractions were performed on sieved streambed sediment collected from three sites along EFPC. Sample ID refers to the sediment size fraction and the sampling location identified by the number of kilometers upstream of the confluence of Poplar Creek and EFPC. Calc. THg refers to the calculated THg concentration and isotopic composition of the sediment based on the weighted average of sequential extractions. Here,  $n_1$  denotes the number of sequential extraction sets,  $n_2$  denotes the number of purge and trap preparations, and  $n_3$  denotes the number of separate isotopic analyses on an individual preparation(s). The percent recovery (% Rec.) for F1 – F5 shows recovery of Hg during the purge and trap procedure for preparation of sequential extraction samples for isotope analysis. The percent recovery for Calc. THg is based on the sum of sequential extractions relative to THg concentrations obtained by combustions. The uncertainty in the isotopic composition of Hg in sequential extraction samples is represented by the average uncertainty (2SD) across all UM-Almadén analyses.

**Table S7.1:** Comparison of sequential extraction replicates.<sup>a</sup>

| Sample ID                          | Sequential Extraction | Rep # | THg<br>( $\mu\text{g g}^{-1}$ ) | % of THg | n <sub>1</sub> | n <sub>2</sub> | % Rec. | $\delta^{204}\text{Hg}$<br>(‰) | 2 $\sigma$<br>(‰) | $\delta^{202}\text{Hg}$<br>(‰) | 2 $\sigma$<br>(‰) | $\delta^{201}\text{Hg}$<br>(‰) | 2 $\sigma$<br>(‰) | $\delta^{200}\text{Hg}$<br>(‰) | 2 $\sigma$<br>(‰) | $\delta^{199}\text{Hg}$<br>(‰) | 2 $\sigma$<br>(‰) | $\Delta^{204}\text{Hg}$<br>(‰) | 2 $\sigma$<br>(‰) | $\Delta^{201}\text{Hg}$<br>(‰) | 2 $\sigma$<br>(‰) | $\Delta^{200}\text{Hg}$<br>(‰) | 2 $\sigma$<br>(‰) | $\Delta^{199}\text{Hg}$<br>(‰) | 2 $\sigma$<br>(‰) |
|------------------------------------|-----------------------|-------|---------------------------------|----------|----------------|----------------|--------|--------------------------------|-------------------|--------------------------------|-------------------|--------------------------------|-------------------|--------------------------------|-------------------|--------------------------------|-------------------|--------------------------------|-------------------|--------------------------------|-------------------|--------------------------------|-------------------|--------------------------------|-------------------|
| EFK 18.0<br>250 $\mu\text{m}$ -1mm | F1                    | Rep 1 | 0.32                            | 1.89     | 1              | 2              | 101.5  | -0.23                          | 0.12              | -0.18                          | 0.08              | -0.18                          | 0.07              | -0.08                          | 0.05              | -0.08                          | 0.05              | 0.03                           | 0.08              | -0.04                          | 0.04              | 0.01                           | 0.04              | -0.04                          | 0.05              |
|                                    | F2                    | Rep 1 | 0.01                            | 0.04     | 1              | 1              | 98.0   | -0.22                          | 0.12              | -0.13                          | 0.08              | -0.15                          | 0.07              | -0.06                          | 0.05              | -0.07                          | 0.05              | -0.02                          | 0.08              | -0.05                          | 0.04              | 0.00                           | 0.04              | -0.03                          | 0.05              |
|                                    | F3                    | Rep 1 | 0.29                            | 1.71     | 1              | 2              | 99.0   | -0.24                          | 0.12              | -0.15                          | 0.08              | -0.13                          | 0.07              | -0.06                          | 0.05              | -0.04                          | 0.05              | -0.02                          | 0.08              | -0.02                          | 0.04              | 0.01                           | 0.04              | -0.01                          | 0.05              |
|                                    | F4                    | Rep 1 | 2.13                            | 12.4     | 2              | 5              | 98.9   | 0.00                           | 0.12              | -0.01                          | 0.08              | -0.09                          | 0.07              | 0.00                           | 0.05              | -0.09                          | 0.05              | 0.01                           | 0.08              | -0.08                          | 0.04              | 0.00                           | 0.04              | -0.09                          | 0.05              |
|                                    | F5                    | Rep 1 | 14.36                           | 83.9     | 1              | 2              | 101.9  | -0.23                          | 0.12              | -0.14                          | 0.08              | -0.16                          | 0.07              | -0.07                          | 0.05              | -0.10                          | 0.05              | -0.02                          | 0.08              | -0.06                          | 0.04              | 0.00                           | 0.04              | -0.07                          | 0.05              |
|                                    | Calc. THg             | Rep 1 | 17.11                           |          |                |                | 105.1  | -0.20                          | 0.12              | -0.12                          | 0.08              | -0.15                          | 0.07              | -0.06                          | 0.05              | -0.10                          | 0.05              | -0.02                          | 0.08              | -0.06                          | 0.04              | 0.00                           | 0.04              | -0.07                          | 0.05              |
|                                    | F1                    | Rep 2 | 0.13                            | 0.78     | 1              | 2              | 99.4   | -0.09                          | 0.12              | -0.07                          | 0.08              | -0.13                          | 0.07              | -0.03                          | 0.05              | -0.10                          | 0.05              | 0.01                           | 0.08              | -0.08                          | 0.04              | 0.01                           | 0.04              | -0.08                          | 0.05              |
|                                    | F2                    | Rep 2 | 0.02                            | 0.11     | 1              | 1              | 96.4   | -0.28                          | 0.12              | -0.19                          | 0.08              | -0.21                          | 0.07              | -0.10                          | 0.05              | -0.09                          | 0.05              | -0.01                          | 0.08              | -0.07                          | 0.04              | -0.01                          | 0.04              | -0.04                          | 0.05              |
|                                    | F3                    | Rep 2 | 0.30                            | 1.77     | 1              | 2              | 100.9  | -0.29                          | 0.12              | -0.19                          | 0.08              | -0.17                          | 0.07              | -0.07                          | 0.05              | -0.05                          | 0.05              | -0.01                          | 0.08              | -0.02                          | 0.04              | 0.03                           | 0.04              | 0.00                           | 0.05              |
|                                    | F4                    | Rep 2 | 1.82                            | 10.8     | 1              | 2              | 98.4   | 0.16                           | 0.12              | 0.11                           | 0.08              | 0.02                           | 0.07              | 0.05                           | 0.05              | -0.06                          | 0.05              | 0.00                           | 0.08              | -0.06                          | 0.04              | -0.01                          | 0.04              | -0.09                          | 0.05              |
|                                    | F5                    | Rep 2 | 14.50                           | 86.5     | 1              | 2              | 98.5   | -0.06                          | 0.12              | -0.03                          | 0.08              | -0.11                          | 0.07              | -0.02                          | 0.05              | -0.09                          | 0.05              | -0.01                          | 0.08              | -0.09                          | 0.04              | 0.00                           | 0.04              | -0.08                          | 0.05              |
| Calc. THg                          | Rep 2                 | 16.76 |                                 |          |                | 102.9          | -0.04  | 0.12                           | -0.02             | 0.08                           | -0.09             | 0.07                           | -0.01             | 0.05                           | -0.09             | 0.05                           | -0.01             | 0.08                           | -0.08             | 0.04                           | 0.00              | 0.04                           | -0.08             | 0.05                           |                   |
| EFK 8.7<br>1-2mm                   | F1                    | Rep 1 | 0.20                            | 0.6      | 2              | 4              | 104.8  | 0.24                           | 0.12              | 0.15                           | 0.08              | 0.01                           | 0.07              | 0.08                           | 0.05              | -0.07                          | 0.05              | 0.00                           | 0.08              | -0.10                          | 0.04              | 0.00                           | 0.04              | -0.11                          | 0.05              |
|                                    | F2                    | Rep 1 | 0.04                            | 0.1      | 2              | 2              | 101.0  | 0.78                           | 0.12              | 0.49                           | 0.08              | 0.28                           | 0.07              | 0.26                           | 0.05              | -0.01                          | 0.05              | 0.05                           | 0.08              | -0.09                          | 0.04              | 0.02                           | 0.04              | -0.13                          | 0.05              |
|                                    | F1                    | Rep 2 | 0.34                            | -        | 1              | 2              | 105.6  | 0.23                           | 0.12              | 0.15                           | 0.08              | -0.01                          | 0.07              | 0.07                           | 0.05              | -0.10                          | 0.05              | 0.01                           | 0.08              | -0.12                          | 0.04              | 0.00                           | 0.04              | -0.14                          | 0.05              |
|                                    | F2                    | Rep 2 | 0.14                            | -        | 1              | 2              | 105.3  | 0.54                           | 0.12              | 0.35                           | 0.08              | 0.15                           | 0.07              | 0.18                           | 0.05              | -0.04                          | 0.05              | 0.02                           | 0.08              | -0.11                          | 0.04              | 0.01                           | 0.04              | -0.13                          | 0.05              |
| EFK 8.7<br>250 $\mu\text{m}$ -1mm  | F1                    | Rep 1 | 0.24                            | 1.0      | 2              | 5              | 104.7  | 0.54                           | 0.12              | 0.34                           | 0.08              | 0.13                           | 0.07              | 0.14                           | 0.05              | -0.08                          | 0.05              | 0.03                           | 0.08              | -0.13                          | 0.04              | -0.03                          | 0.04              | -0.16                          | 0.05              |
|                                    | F2                    | Rep 1 | 0.02                            | 0.1      | 1              | 1              | 101.0  | 0.74                           | 0.12              | 0.44                           | 0.08              | 0.23                           | 0.07              | 0.23                           | 0.05              | -0.02                          | 0.05              | 0.08                           | 0.08              | -0.10                          | 0.04              | 0.01                           | 0.04              | -0.13                          | 0.05              |
|                                    | F1                    | Rep 2 | 0.34                            | -        | 1              | 2              | 102.8  | -0.16                          | 0.12              | -0.11                          | 0.08              | -0.17                          | 0.07              | -0.07                          | 0.05              | -0.14                          | 0.05              | 0.01                           | 0.08              | -0.08                          | 0.04              | -0.01                          | 0.04              | -0.11                          | 0.05              |
|                                    | F2                    | Rep 2 | 0.04                            | -        | 1              | 1              | 104.8  | 0.66                           | 0.12              | 0.40                           | 0.08              | 0.20                           | 0.07              | 0.20                           | 0.05              | -0.04                          | 0.05              | 0.07                           | 0.08              | -0.09                          | 0.04              | 0.00                           | 0.04              | -0.14                          | 0.05              |
| EFK 8.7<br>125-250 $\mu\text{m}$   | F1                    | Rep 1 | 0.05                            | 0.6      | 1              | 2              | 103.8  | 0.08                           | 0.12              | 0.03                           | 0.08              | -0.06                          | 0.07              | -0.01                          | 0.05              | -0.11                          | 0.05              | 0.03                           | 0.08              | -0.09                          | 0.04              | -0.02                          | 0.04              | -0.12                          | 0.05              |
|                                    | F1                    | Rep 2 | 0.04                            | -        | 1              | 1              | 103.0  | 0.17                           | 0.12              | 0.09                           | 0.08              | -0.01                          | 0.07              | 0.06                           | 0.05              | -0.09                          | 0.05              | 0.04                           | 0.08              | -0.07                          | 0.04              | 0.01                           | 0.04              | -0.11                          | 0.05              |
| EFK 8.7<br><125 $\mu\text{m}$      | F1                    | Rep 1 | 0.08                            | 0.4      | 1              | 2              | 105.4  | 0.20                           | 0.12              | 0.14                           | 0.08              | 0.03                           | 0.07              | 0.07                           | 0.05              | -0.06                          | 0.05              | -0.01                          | 0.08              | -0.07                          | 0.04              | 0.00                           | 0.04              | -0.10                          | 0.05              |
|                                    | F1                    | Rep 2 | 0.04                            | -        | 1              | 1              | 104.4  | 0.09                           | 0.12              | 0.06                           | 0.08              | -0.06                          | 0.07              | 0.00                           | 0.05              | -0.10                          | 0.05              | 0.00                           | 0.08              | -0.11                          | 0.04              | -0.03                          | 0.04              | -0.12                          | 0.05              |

<sup>a</sup> See Table S7.2 for notes.

**Table S7.2:** Comparison of sequential extraction replicates.<sup>a</sup>

| Sample ID                    | Sequential Extraction | Rep # | THg (µg g <sup>-1</sup> ) | % of THg | n <sub>1</sub> | n <sub>2</sub> | % Rec. | δ <sup>204</sup> Hg (‰)                     | 2σ (‰) | δ <sup>202</sup> Hg (‰) | 2σ (‰) | δ <sup>201</sup> Hg (‰) | 2σ (‰) | δ <sup>200</sup> Hg (‰) | 2σ (‰) | δ <sup>199</sup> Hg (‰) | 2σ (‰) | Δ <sup>204</sup> Hg (‰) | 2σ (‰) | Δ <sup>201</sup> Hg (‰) | 2σ (‰) | Δ <sup>200</sup> Hg (‰) | 2σ (‰) | Δ <sup>199</sup> Hg (‰) | 2σ (‰) |
|------------------------------|-----------------------|-------|---------------------------|----------|----------------|----------------|--------|---------------------------------------------|--------|-------------------------|--------|-------------------------|--------|-------------------------|--------|-------------------------|--------|-------------------------|--------|-------------------------|--------|-------------------------|--------|-------------------------|--------|
| NIST SRM 2711 (Montana Soil) | F1                    | Rep 1 | 0.05                      | 0.9      | 1              | 1              | 98.0   | -0.34                                       | 0.12   | -0.28                   | 0.08   | -0.35                   | 0.07   | -0.14                   | 0.05   | -0.26                   | 0.05   | 0.07                    | 0.08   | -0.14                   | 0.04   | 0.00                    | 0.04   | -0.19                   | 0.05   |
|                              | F2                    | Rep 1 | 0.00                      | 0.1      |                |                |        | Insufficient mercury for isotopic analysis. |        |                         |        |                         |        |                         |        |                         |        |                         |        |                         |        |                         |        |                         |        |
|                              | F3                    | Rep 1 | 0.15                      | 2.5      | 2              | 2              | 94.6   | -0.29                                       | 0.12   | -0.22                   | 0.08   | -0.32                   | 0.07   | -0.12                   | 0.05   | -0.26                   | 0.05   | 0.04                    | 0.08   | -0.15                   | 0.04   | -0.01                   | 0.04   | -0.20                   | 0.05   |
|                              | F4                    | Rep 1 | 4.03                      | 69.0     | 2              | 3              | 97.0   | -0.06                                       | 0.12   | -0.05                   | 0.08   | -0.23                   | 0.07   | -0.03                   | 0.05   | -0.24                   | 0.05   | 0.01                    | 0.08   | -0.19                   | 0.04   | -0.01                   | 0.04   | -0.22                   | 0.05   |
|                              | F5                    | Rep 1 | 1.61                      | 27.5     | 2              | 3              | 97.3   | -0.61                                       | 0.12   | -0.42                   | 0.08   | -0.50                   | 0.07   | -0.22                   | 0.05   | -0.31                   | 0.05   | 0.01                    | 0.08   | -0.19                   | 0.04   | -0.01                   | 0.04   | -0.21                   | 0.05   |
|                              | Calc. THg             | Rep 1 | 5.84                      |          |                |                | 93.4   | -0.22                                       | 0.12   | -0.16                   | 0.08   | -0.31                   | 0.07   | -0.09                   | 0.05   | -0.26                   | 0.05   | 0.02                    | 0.08   | -0.19                   | 0.04   | -0.01                   | 0.04   | -0.22                   | 0.05   |
|                              | F1                    | Rep 2 | 0.05                      | 0.8      | 2              | 2              | 99.0   | -0.32                                       | 0.12   | -0.21                   | 0.08   | -0.33                   | 0.07   | -0.11                   | 0.05   | -0.25                   | 0.05   | -0.01                   | 0.08   | -0.17                   | 0.04   | 0.00                    | 0.04   | -0.20                   | 0.05   |
|                              | F2                    | Rep 2 | 0.00                      | 0.1      | 1              | 1              | 93.8   | -1.41                                       | 0.12   | -0.94                   | 0.08   | -0.75                   | 0.07   | -0.42                   | 0.05   | -0.37                   | 0.05   | -0.01                   | 0.08   | -0.04                   | 0.04   | 0.05                    | 0.04   | -0.13                   | 0.05   |
|                              | F3                    | Rep 2 | 0.15                      | 2.5      | 1              | 2              | 103.3  | -0.43                                       | 0.12   | -0.28                   | 0.08   | -0.35                   | 0.07   | -0.16                   | 0.05   | -0.25                   | 0.05   | -0.01                   | 0.08   | -0.14                   | 0.04   | -0.02                   | 0.04   | -0.18                   | 0.05   |
|                              | F4                    | Rep 2 | 4.25                      | 70.5     | 1              | 2              | 95.3   | -0.18                                       | 0.12   | -0.15                   | 0.08   | -0.32                   | 0.07   | -0.08                   | 0.05   | -0.27                   | 0.05   | 0.03                    | 0.08   | -0.21                   | 0.04   | 0.00                    | 0.04   | -0.23                   | 0.05   |
|                              | F5                    | Rep 2 | 1.58                      | 26.2     | 1              | 2              | 96.9   | -0.65                                       | 0.12   | -0.46                   | 0.08   | -0.51                   | 0.07   | -0.23                   | 0.05   | -0.33                   | 0.05   | 0.04                    | 0.08   | -0.16                   | 0.04   | 0.00                    | 0.04   | -0.22                   | 0.05   |
|                              | Calc. THg             | Rep 2 | 6.03                      |          |                |                | 96.5   | -0.31                                       | 0.12   | -0.23                   | 0.08   | -0.37                   | 0.07   | -0.12                   | 0.05   | -0.29                   | 0.05   | 0.03                    | 0.08   | -0.19                   | 0.04   | 0.00                    | 0.04   | -0.23                   | 0.05   |
|                              | F1                    | Rep 3 | 0.12                      | 2.1      | 1              | 2              | 98.1   | -0.24                                       | 0.12   | -0.15                   | 0.08   | -0.30                   | 0.07   | -0.06                   | 0.05   | -0.25                   | 0.05   | -0.01                   | 0.08   | -0.19                   | 0.04   | 0.02                    | 0.04   | -0.21                   | 0.05   |
|                              | F2                    | Rep 3 | 0.00                      | 0.1      | 1              | 1              | 98.1   | -0.94                                       | 0.12   | -0.68                   | 0.08   | -0.58                   | 0.07   | -0.28                   | 0.05   | -0.25                   | 0.05   | 0.07                    | 0.08   | -0.07                   | 0.04   | 0.06                    | 0.04   | -0.08                   | 0.05   |
|                              | F3                    | Rep 3 | 0.17                      | 2.8      | 2              | 5              | 94.6   | -0.37                                       | 0.12   | -0.23                   | 0.08   | -0.33                   | 0.07   | -0.12                   | 0.05   | -0.24                   | 0.05   | -0.02                   | 0.08   | -0.15                   | 0.04   | 0.00                    | 0.04   | -0.19                   | 0.05   |
|                              | F4                    | Rep 3 | 3.92                      | 65.3     | 1              | 2              | 100.9  | -0.13                                       | 0.12   | -0.07                   | 0.08   | -0.26                   | 0.07   | -0.03                   | 0.05   | -0.25                   | 0.05   | -0.02                   | 0.08   | -0.20                   | 0.04   | 0.00                    | 0.04   | -0.23                   | 0.05   |
|                              | F5                    | Rep 3 | 1.79                      | 29.8     | 1              | 2              | 102.5  | -0.62                                       | 0.12   | -0.41                   | 0.08   | -0.50                   | 0.07   | -0.22                   | 0.05   | -0.32                   | 0.05   | 0.00                    | 0.08   | -0.19                   | 0.04   | -0.02                   | 0.04   | -0.22                   | 0.05   |
|                              | Calc. THg             | Rep 3 | 6.01                      |          |                |                | 96.1   | -0.28                                       | 0.12   | -0.18                   | 0.08   | -0.33                   | 0.07   | -0.09                   | 0.05   | -0.27                   | 0.05   | -0.02                   | 0.08   | -0.20                   | 0.04   | 0.00                    | 0.04   | -0.23                   | 0.05   |

<sup>a</sup> Five-step sequential extractions were performed on standard reference materials and on sieved streambed sediment collected from three sites along EFPC. Sample ID refers to the sediment size fraction and the sampling location identified by the number of kilometers upstream of the confluence of Poplar Creek and EFPC. Calc. THg refers to the calculated THg concentration and isotopic composition of the sediment based on the weighted average of sequential extractions. Rep # refers to sequential extraction replicates on separate aliquots of sediment. Here, n<sub>1</sub> denotes the number of purge and trap preparations, and n<sub>2</sub> denotes the number of separate isotopic analyses on an individual preparation(s). The percent recovery (% Rec.) for F1 – F5 shows recovery of Hg during the purge and trap procedure for preparation of sequential extraction samples for isotope analysis. The percent recovery for Calc. THg of EFPC sediment is based on the sum of sequential extractions relative to THg concentrations obtained by combustions. The percent recovery for Calc. THg of reference materials is based on the sum of sequential extractions relative to certified values. The uncertainty in the isotopic composition of Hg in sequential extraction samples is represented by the average uncertainty (2SD) across all UM-Almadén analyses.

**Table S8:** Results of loss-on-ignition.<sup>a</sup>

| Site ID                                 | Size Fraction          | Percent mass loss after 500°C (i.e., organic matter) ( $\pm 1SD, n=2$ ) | Percent mass loss after 800°C (i.e., carbonates) ( $\pm 1SD, n=2$ ) | Calculated percent organic carbon ( $\pm 1SD, n=2$ ) | Total Hg per mass of organic carbon, $\mu\text{g THg g}^{-1} \text{OC}$ ( $\pm 1SD, n=2$ ) | F3-extracted Hg per mass of organic matter carbon, $\mu\text{g Hg}_{F3} \text{g}^{-1} \text{OC}$ ( $\pm 1SD, n=2$ ) |
|-----------------------------------------|------------------------|-------------------------------------------------------------------------|---------------------------------------------------------------------|------------------------------------------------------|--------------------------------------------------------------------------------------------|---------------------------------------------------------------------------------------------------------------------|
| EFK 22.3                                | 1-2mm                  | 4.39 $\pm$ 0.24                                                         | 2.56 $\pm$ 0.65                                                     | 2.19 $\pm$ 0.12                                      | 970 $\pm$ 504                                                                              | 34.2 $\pm$ 1.9                                                                                                      |
|                                         | 250 $\mu\text{m}$ -1mm | 3.09                                                                    | 2.78                                                                | 1.54                                                 | 1175                                                                                       | 19.0                                                                                                                |
|                                         | 125-250 $\mu\text{m}$  | 4.15                                                                    | 2.28                                                                | 2.08                                                 | 1259                                                                                       | 30.1                                                                                                                |
|                                         | <125 $\mu\text{m}$     | 6.04                                                                    | 2.37                                                                | 3.02                                                 | 1159                                                                                       | 29.4                                                                                                                |
| EFK 18.0                                | 1-2mm                  | 4.14                                                                    | 3.70                                                                | 2.07                                                 | 1188                                                                                       | 14.6                                                                                                                |
|                                         | 250 $\mu\text{m}$ -1mm | 2.71 $\pm$ 0.19                                                         | 2.55 $\pm$ 0.07                                                     | 1.36 $\pm$ 0.09                                      | 1205 $\pm$ 133                                                                             | 21.8 $\pm$ 1.5                                                                                                      |
|                                         | 125-250 $\mu\text{m}$  | 2.57                                                                    | 2.43                                                                | 1.28                                                 | 1306                                                                                       | 33.6                                                                                                                |
|                                         | <125 $\mu\text{m}$     | 7.15                                                                    | 2.81                                                                | 3.57                                                 | 1099                                                                                       | 25.4                                                                                                                |
| EFK 15.8                                | 1-2mm                  | 3.18                                                                    | 1.17                                                                | 1.59                                                 | 1656                                                                                       | -                                                                                                                   |
|                                         | 250 $\mu\text{m}$ -1mm | 2.18                                                                    | 0.91                                                                | 1.09                                                 | 2174                                                                                       | -                                                                                                                   |
|                                         | 125-250 $\mu\text{m}$  | 2.02 $\pm$ 0.27                                                         | 0.87 $\pm$ 0.08                                                     | 1.01 $\pm$ 0.13                                      | 1510 $\pm$ 238                                                                             | -                                                                                                                   |
|                                         | <125 $\mu\text{m}$     | 5.04                                                                    | 1.61                                                                | 2.52                                                 | 846                                                                                        | -                                                                                                                   |
| EFK 8.7                                 | 1-2mm                  | 1.77                                                                    | 0.50                                                                | 0.89                                                 | 4715                                                                                       | 190                                                                                                                 |
|                                         | 250 $\mu\text{m}$ -1mm | 1.22                                                                    | 0.24                                                                | 0.61                                                 | 3802                                                                                       | 234                                                                                                                 |
|                                         | 125-250 $\mu\text{m}$  | 1.95                                                                    | 0.13                                                                | 0.98                                                 | 731                                                                                        | 166                                                                                                                 |
|                                         | <125 $\mu\text{m}$     | 5.74 $\pm$ 0.01                                                         | 0.87 $\pm$ 0.04                                                     | 2.87 $\pm$ 0.01                                      | 706 $\pm$ 5                                                                                | 37.2 $\pm$ 0.1                                                                                                      |
| NIST SRM 1944 (NY/NJ Waterway Sediment) |                        | 8.77 $\pm$ 0.06                                                         | 1.73 $\pm$ 0.14                                                     | 4.38 $\pm$ 0.03                                      | 82 $\pm$ 1                                                                                 | 7.0 $\pm$ 0.0                                                                                                       |

<sup>a</sup> A loss-on-ignition procedure was performed on sieved streambed sediment collected from four sites along EFPC. Site ID refers to the sampling location identified by the number of kilometers upstream of the confluence of Poplar Creek and EFPC. Percentages of mass loss after 500°C and 800°C are thought to primarily represent percentages of organic matter and carbonates, respectively. Percentages of organic carbon were calculated by dividing the percentages of mass lost after 500°C by 2. Concentrations of total Hg per mass of organic carbon ( $\mu\text{g THg g}^{-1} \text{OC}$ ) were calculated using THg concentrations measured via combustion (Table S3, Table S4), and for values represented by an average  $\pm 1SD$ , these averages were based on independently ground sediment samples which were each analyzed for THg and OC concentrations. Concentrations of F3-extracted Hg per mass of organic carbon ( $\mu\text{g Hg}_{F3} \text{g}^{-1} \text{OC}$ ) were calculated using Hg concentrations of the F3 sequential extractions (Table S6), and for values represented by an average  $\pm 1SD$ , these averages were based on replicate OC concentrations.



**Table S9:** Results of two-tailed paired samples t-tests for EFPC sediment sequential extraction results.

| Sampling site | Group 1 <sup>a</sup> | Group 2 <sup>a</sup> | Mean Offset in $\delta^{202}\text{Hg}$ (1SD) | Mean Offset in $\Delta^{199}\text{Hg}$ (1SD) | p-value <sup>b</sup> ( $\delta^{202}\text{Hg}$ ) | p-value <sup>c</sup> ( $\Delta^{199}\text{Hg}$ ) |
|---------------|----------------------|----------------------|----------------------------------------------|----------------------------------------------|--------------------------------------------------|--------------------------------------------------|
| EFK 22.3      | F2                   | F3                   | $-0.20 \pm 0.22\text{‰}$                     | $-0.01 \pm 0.02\text{‰}$                     | 0.175                                            | 0.361                                            |
| EFK 18.0      | F2                   | F3                   | $-0.13 \pm 0.25\text{‰}$                     | $-0.02 \pm 0.03\text{‰}$                     | 0.366                                            | 0.331                                            |
| EFK 8.7       | F2                   | F3                   | $0.09 \pm 0.34\text{‰}$                      | $0.00 \pm 0.06\text{‰}$                      | 0.631                                            | 0.952                                            |
| EFK 22.3      | F4                   | F5                   | $0.16 \pm 0.12\text{‰}$                      | $0.00 \pm 0.02\text{‰}$                      | 0.075                                            | 0.629                                            |
| EFK 18.0      | F4                   | F5                   | $0.16 \pm 0.08\text{‰}$                      | $-0.01 \pm 0.02\text{‰}$                     | 0.030*                                           | 0.651                                            |
| EFK 8.7       | F4                   | F5                   | $0.34 \pm 0.07\text{‰}$                      | $-0.01 \pm 0.00\text{‰}$                     | 0.002*                                           | 0.010*                                           |

<sup>a</sup> Group 1 and Group 2 represent different pools of extracted Hg (n=4 for each group).

<sup>b</sup> Null hypothesis: The mean offset in  $\delta^{202}\text{Hg}$  values of different pools of extracted Hg within individual sediment size fractions (i.e., paired samples) is zero.

<sup>c</sup> Null hypothesis: The mean offset in  $\Delta^{199}\text{Hg}$  values of different pools of extracted Hg within individual sediment size fractions (i.e., paired samples) is zero.

\* indicates that the mean offset in delta values of different pools of extracted Hg within individual sediment size fractions is significantly different from zero ( $p < 0.05$ ).

**Table S10:** Results of two-tailed paired samples t-tests for EFPC sediment sequential extraction results using the Bonferroni correction for multiple comparisons.

| Sampling site | Group 1 <sup>a</sup> | Group 2 <sup>a</sup> | Mean Offset in $\delta^{202}\text{Hg}$ (1SD) | Mean Offset in $\Delta^{199}\text{Hg}$ (1SD) | p-value <sub>adjusted</sub> <sup>b</sup> ( $\delta^{202}\text{Hg}$ ) | p-value <sub>adjusted</sub> <sup>c</sup> ( $\Delta^{199}\text{Hg}$ ) |
|---------------|----------------------|----------------------|----------------------------------------------|----------------------------------------------|----------------------------------------------------------------------|----------------------------------------------------------------------|
| EFK 22.3      | F1                   | F2F3                 | $0.04 \pm 0.29\%$                            | $-0.06 \pm 0.02\%$                           | 1.000                                                                | 0.034*                                                               |
| EFK 22.3      | F1                   | F4F5                 | $-0.19 \pm 0.26\%$                           | $0.03 \pm 0.03\%$                            | 0.730                                                                | 0.960                                                                |
| EFK 22.3      | F2F3                 | F4F5                 | $-0.23 \pm 0.05\%$                           | $0.09 \pm 0.02\%$                            | 0.007*                                                               | 0.011*                                                               |
| EFK 18.0      | F1                   | F2F3                 | $0.04 \pm 0.13\%$                            | $-0.05 \pm 0.02\%$                           | 1.000                                                                | 0.096                                                                |
| EFK 18.0      | F1                   | F4F5                 | $-0.21 \pm 0.19\%$                           | $0.03 \pm 0.04\%$                            | 0.354                                                                | 0.611                                                                |
| EFK 18.0      | F2F3                 | F4F5                 | $-0.25 \pm 0.17\%$                           | $0.08 \pm 0.02\%$                            | 0.184                                                                | 0.011*                                                               |
| EFK 8.7       | F1                   | F2F3                 | $0.06 \pm 0.14\%$                            | $-0.05 \pm 0.03\%$                           | 1.000                                                                | 0.138                                                                |
| EFK 8.7       | F1                   | F4F5                 | $0.16 \pm 0.12\%$                            | $0.00 \pm 0.01\%$                            | 0.242                                                                | 1.000                                                                |
| EFK 8.7       | F2F3                 | F4F5                 | $0.10 \pm 0.24\%$                            | $0.04 \pm 0.04\%$                            | 1.000                                                                | 0.258                                                                |

<sup>a</sup> Group 1 and Group 2 represent different pools of extracted Hg (n=4 for each group). The isotopic composition of groups F2F3 and F4F5 was calculated as the non-weighted average isotopic composition of the two pools of sequentially extracted Hg within the group.

<sup>b</sup> Null hypothesis: The mean offset in  $\delta^{202}\text{Hg}$  values of different pools of extracted Hg within individual sediment size fractions (i.e., paired samples) is zero.

<sup>c</sup> Null hypothesis: The mean offset in  $\Delta^{199}\text{Hg}$  values of different pools of extracted Hg within individual sediment size fractions (i.e., paired samples) is zero.

\* indicates that the mean offset in delta values of different pools of extracted Hg within individual sediment size fractions is significantly different from zero ( $p < 0.05$ ).

**Table S11:** Results of two-tailed paired samples t-tests for EFPC sediment sequential extraction results using the Bonferroni correction for multiple comparisons, excluding the F2 mercury pool.

| Sampling site | Group 1 <sup>a</sup> | Group 2 <sup>a</sup> | Mean Offset in $\delta^{202}\text{Hg}$ (1SD) | Mean Offset in $\Delta^{199}\text{Hg}$ (1SD) | p-value <sub>adjusted</sub> <sup>b</sup> ( $\delta^{202}\text{Hg}$ ) | p-value <sub>adjusted</sub> <sup>c</sup> ( $\Delta^{199}\text{Hg}$ ) |
|---------------|----------------------|----------------------|----------------------------------------------|----------------------------------------------|----------------------------------------------------------------------|----------------------------------------------------------------------|
| EFK 22.3      | F1                   | F3                   | -0.06 ± 0.35‰                                | -0.07 ± 0.02‰                                | 1.000                                                                | 0.017*                                                               |
| EFK 22.3      | F1                   | F4F5                 | -0.19 ± 0.26‰                                | 0.03 ± 0.03‰                                 | 0.730                                                                | 0.960                                                                |
| EFK 22.3      | F3                   | F4F5                 | -0.13 ± 0.12‰                                | 0.09 ± 0.02‰                                 | 0.371                                                                | 0.011*                                                               |
| EFK 18.0      | F1                   | F3                   | -0.02 ± 0.10‰                                | -0.06 ± 0.01‰                                | 1.000                                                                | 0.004*                                                               |
| EFK 18.0      | F1                   | F4F5                 | -0.21 ± 0.19‰                                | 0.03 ± 0.04‰                                 | 0.364                                                                | 0.611                                                                |
| EFK 18.0      | F3                   | F4F5                 | -0.18 ± 0.09‰                                | 0.09 ± 0.03‰                                 | 0.087                                                                | 0.028*                                                               |
| EFK 8.7       | F1                   | F3                   | 0.11 ± 0.05‰                                 | -0.05 ± 0.02‰                                | 0.068                                                                | 0.055                                                                |
| EFK 8.7       | F1                   | F4F5                 | 0.16 ± 0.12‰                                 | 0.00 ± 0.01‰                                 | 0.242                                                                | 1.000                                                                |
| EFK 8.7       | F3                   | F4F5                 | 0.05 ± 0.09‰                                 | 0.05 ± 0.02‰                                 | 0.921                                                                | 0.032*                                                               |

<sup>a</sup> Group 1 and Group 2 represent different pools of extracted Hg (n=4 for each group). The isotopic composition of group F4F5 was calculated as the non-weighted average isotopic composition of the two pools of sequentially extracted Hg within the group.

<sup>b</sup> Null hypothesis: The mean offset in  $\delta^{202}\text{Hg}$  values of different pools of extracted Hg within individual sediment size fractions (i.e., paired samples) is zero.

<sup>c</sup> Null hypothesis: The mean offset in  $\Delta^{199}\text{Hg}$  values of different pools of extracted Hg within individual sediment size fractions (i.e., paired samples) is zero.

\* indicates that the mean offset in delta values of different pools of extracted Hg within individual sediment size fractions is significantly different from zero ( $p < 0.05$ ).

**Table S12:** Results of two-tailed independent samples t-tests for EFPC sediment sequential extraction results.

| Sampling site | G1 <sup>a</sup> | G2 <sup>a</sup> | Mean $\delta^{202}\text{Hg}$ Group 1 (1SD) | Mean $\delta^{202}\text{Hg}$ Group 2 (1SD) | Mean $\Delta^{199}\text{Hg}$ Group 1 (1SD) | Mean $\Delta^{199}\text{Hg}$ Group 2 (1SD) | p-value <sup>b</sup> ( $\delta^{202}\text{Hg}$ ) | p-value <sup>c</sup> ( $\Delta^{199}\text{Hg}$ ) |
|---------------|-----------------|-----------------|--------------------------------------------|--------------------------------------------|--------------------------------------------|--------------------------------------------|--------------------------------------------------|--------------------------------------------------|
| EFK 22.3      | F2              | F3              | $-0.24 \pm 0.29\text{‰}$                   | $-0.04 \pm 0.31\text{‰}$                   | $0.00 \pm 0.03\text{‰}$                    | $0.01 \pm 0.02\text{‰}$                    | 0.389                                            | 0.553                                            |
| EFK 18.0      | F2              | F3              | $-0.23 \pm 0.30\text{‰}$                   | $-0.10 \pm 0.08\text{‰}$                   | $-0.03 \pm 0.03\text{‰}$                   | $-0.01 \pm 0.02\text{‰}$                   | 0.416                                            | 0.362                                            |
| EFK 8.7       | F2              | F3              | $0.15 \pm 0.37\text{‰}$                    | $0.06 \pm 0.08\text{‰}$                    | $-0.08 \pm 0.06\text{‰}$                   | $-0.08 \pm 0.02\text{‰}$                   | 0.653                                            | 0.959                                            |
| EFK 22.3      | F4              | F5              | $0.17 \pm 0.21\text{‰}$                    | $0.01 \pm 0.27\text{‰}$                    | $-0.09 \pm 0.03\text{‰}$                   | $-0.08 \pm 0.03\text{‰}$                   | 0.392                                            | 0.853                                            |
| EFK 18.0      | F4              | F5              | $0.17 \pm 0.14\text{‰}$                    | $0.01 \pm 0.18\text{‰}$                    | $-0.10 \pm 0.03\text{‰}$                   | $-0.09 \pm 0.03\text{‰}$                   | 0.207                                            | 0.362                                            |
| EFK 8.7       | F4              | F5              | $0.18 \pm 0.14\text{‰}$                    | $-0.17 \pm 0.10\text{‰}$                   | $-0.13 \pm 0.02\text{‰}$                   | $-0.11 \pm 0.02\text{‰}$                   | 0.006*                                           | 0.317                                            |

<sup>a</sup> Group 1 (G1) and Group 2 (G2), representing different pools of extracted Hg (n=4 for each group).

<sup>b</sup> Null hypothesis: Across all sediment size fractions within a site (i.e., unpaired samples), the difference between mean  $\delta^{202}\text{Hg}$  values of different pools of extracted Hg is zero.

<sup>b</sup> Null hypothesis: Across all sediment size fractions within a site (i.e., unpaired samples), the difference between mean  $\Delta^{199}\text{Hg}$  values of different pools of extracted Hg is zero.

\* indicates that the mean delta values of different pools of extracted Hg are significantly different from each other ( $p < 0.05$ ).

**Table S13:** Results of independent samples Tukey honestly significant difference (HSD) tests for multiple comparisons for EFPC sediment sequential extraction results.

| Sampling site | G1 <sup>a</sup> | G2 <sup>a</sup> | Mean $\delta^{202}\text{Hg}$ Group 1 (1SD) | Mean $\delta^{202}\text{Hg}$ Group 2 (1SD) | Mean $\Delta^{199}\text{Hg}$ Group 1 (1SD) | Mean $\Delta^{199}\text{Hg}$ Group 2 (1SD) | p-value <sub>adj.</sub> <sup>b</sup> ( $\delta^{202}\text{Hg}$ ) | p-value <sub>adj.</sub> <sup>c</sup> ( $\Delta^{199}\text{Hg}$ ) |
|---------------|-----------------|-----------------|--------------------------------------------|--------------------------------------------|--------------------------------------------|--------------------------------------------|------------------------------------------------------------------|------------------------------------------------------------------|
| EFK 22.3      | F1              | F2F3            | -0.10 ± 0.08‰                              | -0.14 ± 0.30‰                              | -0.06 ± 0.01‰                              | 0.00 ± 0.03‰                               | 0.900                                                            | 0.018*                                                           |
| EFK 22.3      | F1              | F4F5            | -0.10 ± 0.08‰                              | 0.09 ± 0.24‰                               | -0.06 ± 0.01‰                              | -0.08 ± 0.03‰                              | 0.469                                                            | 0.441                                                            |
| EFK 22.3      | F2F3            | F4F5            | -0.14 ± 0.30‰                              | 0.09 ± 0.24‰                               | 0.00 ± 0.03‰                               | -0.08 ± 0.03‰                              | 0.336                                                            | 0.003*                                                           |
| EFK 18.0      | F1              | F2F3            | -0.12 ± 0.09‰                              | -0.16 ± 0.21‰                              | -0.06 ± 0.02‰                              | -0.02 ± 0.03‰                              | 0.900                                                            | 0.055                                                            |
| EFK 18.0      | F1              | F4F5            | -0.12 ± 0.09‰                              | 0.09 ± 0.17‰                               | -0.06 ± 0.02‰                              | -0.10 ± 0.03‰                              | 0.165                                                            | 0.215                                                            |
| EFK 18.0      | F2F3            | F4F5            | -0.16 ± 0.21‰                              | 0.09 ± 0.17‰                               | -0.02 ± 0.03‰                              | -0.10 ± 0.03‰                              | 0.085                                                            | 0.004*                                                           |
| EFK 8.7       | F1              | F2F3            | 0.17 ± 0.13‰                               | 0.11 ± 0.25‰                               | -0.12 ± 0.03‰                              | -0.08 ± 0.04‰                              | 0.833                                                            | 0.126                                                            |
| EFK 8.7       | F1              | F4F5            | 0.17 ± 0.13‰                               | 0.01 ± 0.21‰                               | -0.12 ± 0.03‰                              | -0.12 ± 0.02‰                              | 0.357                                                            | 0.900                                                            |
| EFK 8.7       | F2F3            | F4F5            | 0.11 ± 0.25‰                               | 0.01 ± 0.21‰                               | -0.08 ± 0.04‰                              | -0.12 ± 0.02‰                              | 0.652                                                            | 0.139                                                            |

<sup>a</sup> Group 1 (G1) and Group 2 (G2), representing different pools of extracted Hg (n=4 for each group). The isotopic composition of groups F2F3 and F4F5 was calculated as the non-weighted average isotopic composition of the two pools of sequentially extracted Hg within the group.

<sup>b</sup> Null hypothesis: Across all sediment size fractions within a site (i.e., unpaired samples), the difference between mean  $\delta^{202}\text{Hg}$  values of different pools of extracted Hg is zero.

<sup>c</sup> Null hypothesis: Across all sediment size fractions within a site (i.e., unpaired samples), the difference between mean  $\Delta^{199}\text{Hg}$  values of different pools of extracted Hg is zero.

\* indicates that the mean delta values of different pools of extracted Hg are significantly different from each other ( $p < 0.05$ ).

## REFERENCES

1. U. S. EPA, *Method 1631, Revision E: Mercury in Water by Oxidation, Purge and Trap, and Cold Vapor Atomic Fluorescence Spectrometry*, EPA-821-R-02-019, U.S. Environmental Protection Agency, Office of Water, Washington, D.C., 2002.
2. U. S. EPA, *Definition and Procedure for the Determination of the Method Detection Limit, Revision 2*, U.S. Environmental Protection Agency, Office of Water, Washington, D.C., 2016.
3. N. S. Bloom, E. Preus, J. Katon and M. Hiltner, Selective extractions to assess the biogeochemically relevant fractionation of inorganic mercury in sediments and soils, *Anal. Chim. Acta*, 2003, **479**, 233-248.
4. J. G. Wiederhold, U. Skyllberg, A. Drott, M. Jiskra, S. Jonsson, E. Björn, B. Bourdon and R. Kretzschmar, Mercury isotope signatures in contaminated sediments as a tracer for local industrial pollution sources, *Environ. Sci. Technol.*, 2015, **49**, 177-185.
5. A. R. C. Grigg, R. Kretzschmar, R. S. Gilli and J. G. Wiederhold, Mercury isotope signatures of digests and sequential extracts from industrially contaminated soils and sediments, *Sci. Total Environ.*, 2018, **636**, 1344-1354.
6. G. R. Aiken, D. M. McKnight, R. L. Wershaw and P. MacCarthy, *Humic Substances in Soil, Sediment, and Water*, Wiley-Interscience, New York, 1985.
7. J. D. Blum and M. W. Johnson, Recent developments in mercury stable isotope analysis, *Rev. Mineral. Geochem.*, 2017, **82**, 733-757.
8. S. Brooks, V. Eller, J. Dickson, J. Earles, K. Lowe, T. Mehlhorn, T. Olsen, C. DeRolph, D. Watson, D. Phillips and M. Peterson, *Mercury Content of Sediments in East Fork Poplar Creek: Current Assessment and Past Trends*, ORNL/TM-2016/578, Oak Ridge National Laboratory, Oak Ridge, TN, 2017.
9. R. P. Eganhouse, D. R. Young and J. N. Johnson, Geochemistry of mercury in Palos Verdes sediments, *Environ. Sci. Technol.*, 1978, **12**, 1151-1157.
10. G. E. M. Hall, P. Pelchat and J. B. Percival, The design and application of sequential extractions for mercury, Part 1. Optimization of HNO<sub>3</sub> extraction for all non-sulphide forms of Hg, *Geochem.: Explor. Environ., Anal.*, 2005, **5**, 107-113.
11. F. M. Brocza, H. Biester, J.-H. Richard, S. M. Kraemer and J. G. Wiederhold, Mercury isotope fractionation in the subsurface of a Hg(II) chloride-contaminated industrial legacy site, *Environ. Sci. Technol.*, 2019, **53**, 7296-7305.
12. D. York, Least-squares fitting of a straight line, *Can. J. Phys.*, 1966, **44**, 1079-1086.
13. P. Vermeesch, IsoplotR: A free and open toolbox for geochronology, *Geosci. Front.*, 2018, **9**, 1479-1493.
14. P. M. Donovan, J. D. Blum, J. D. Demers, B. Gu, S. C. Brooks and J. Peryam, Identification of multiple mercury sources to stream sediments near Oak Ridge, TN, USA, *Environ. Sci. Technol.*, 2014, **48**, 3666-3674.
15. J. D. Demers, J. D. Blum, S. C. Brooks, P. M. Donovan, A. L. Riscassi, C. L. Miller, W. Zheng and B. Gu, Hg isotopes reveal in-stream processing and legacy inputs in East Fork Poplar Creek, Oak Ridge, Tennessee, USA, *Environ. Sci.: Processes Impacts*, 2018, **20**, 686-707.
